# Supplementary material for: Analysis of Common SNPs across Continents Reveals Major Genomic Differences between Human Populations
Source: MDPI journal article supplement (doi:10.3390/genes13081472), 2022-08-18
Supplement: s1 [file s1]

## ATLAS3 PROTOCOLS

September 11, 2020

```
grep -e Kho_AFR -e Con_AFR -e JuX_AFR Cha_XXX_Chagyrskaya_dat3
1563 grep Pap_OCE Cha_XXX_Chagyrskaya_dat3
1564 grep FIN_EUR Cha_XXX_Chagyrskaya_dat3
1565 grep -e Kho_AFR -e Con_AFR -e JuX_AFR Cha_XXX_Chagyrskaya_dat3
>ATLAS3_AFR_Cha_XXX
1566 grep Pap_OCE Cha_XXX_Chagyrskaya_dat3 >ATLAS3_OCE_Cha_XXX
1567 grep FIN_EUR Cha_XXX_Chagyrskaya_dat3 >ATLAS3_FIN_Cha_XXX
1568 pwd
1569 mv ATLAS3* ..
1570 exit
1571 cd MAY2020/
1572 ls
1573 cd DATAjune2020
1574 history
1575 grep -e TSI_EUR -e IBS_EUR Cha_XXX_Chagyrskaya_dat3
1576 grep -e TSI_EUR -e IBS_EUR Cha_XXX_Chagyrskaya_dat3 >A3_TSI_IBS_Cha_XXX
1577 ls Ust_XXX*
1578 grep -e TSI_EUR -e IBS_EUR Ust_XXX_Ustishim_dat3 >A3_TSI_IBS_Ust_XXX
1579 history
afedorov@bio:~/MAY2020/DATAjune2020$ grep -e Kho_AFR -e Con_AFR -e JuX_AFR
Ust_XXX_Ustishim_dat3 >A3_AFR_Ust_XXX
afedorov@bio:~/MAY2020/DATAjune2020$ grep Pap_OCE Ust_XXX_Ustishim_dat3
>A3_OCE_Ust_XXX
afedorov@bio:~/MAY2020/DATAjune2020$ grep -e FIN_EUR -e CEU_EUR
Ust_XXX_Ustishim_dat3 >A3_FIN_CEU_Ust_XX
afedorov@bio:~/MAY2020/DATAjune2020$ ls -l A3_*
-rw-rw-r-- 1 afedorov afedorov 4445 сен 12 02:23 A3_AFR_Ust_XXX
-rw-rw-r-- 1 afedorov afedorov 4456 сен 12 02:25 A3_FIN_CEU_Ust_XX
-rw-rw-r-- 1 afedorov afedorov 4693 сен 12 02:24 A3_OCE_Ust_XXX
-rw-rw-r-- 1 afedorov afedorov 145056 сен 12 02:21 A3_TSI_IBS_Cha_XXX
-rw-rw-r-- 1 afedorov afedorov 9372 сен 12 02:22 A3_TSI_IBS_Ust_XXX
afedorov@bio:~/MAY2020/DATAjune2020$ mv A3_* ..
```

November 20, 2020

Mapping Neanderthal's IBDs on Chromosome-1

```
/home/afedorov/AI3
afedorov@bio:~/AI3$ ls
NeanderthalIBDdistribution.pl TESTING TRAINING
#!/usr/local/perl
%H=(); #hash of starting position IBD => length IBD
@N = (); #array starting positions of IBDs
$c=$c2=0; #counter

open(IN, "/home/afedorov/MAY2020/DATAjune2020/Cha_XXX_Chagyrskaya_dat3");
while(<IN>) {
    chop;
    @a=split(/\t/, $_);
    if ($a[0] =~ /CHR1\b/) {
        # print "$a[1]\t$a[8]\n";
        unless($H{$a[1]}) {$H{$a[1]}=$a[8]; push(@N,$a[1]);}
        else {$H{$a[1]} .= "\t" . $a[8];}
    }
}
@S = sort { $a <=> $b } @N;
$END = 0;
for $x (0..$#S) {
    @b=split("\t", $H{$S[$x]});
    @s = sort { $a <=> $b } @b;
    $max = $s[$#s];
    $end = $S[$x] + $max;
    $c++;
    if ($end <=$END) {next;}
    else {
        $END = $end;
        print $S[$x], "\t", $max, "\n";
        $c2++;
    }
}
print "Number of rows is $c new C2 is $c2\n";
```

**Studying IBDs between AFR and OCE or EAS:**

```
2069 cd MAY2020/
2070 ls
2071 cd DATAjune2020
2072 ls
2073 grep EAS MSL_AFR_HG03095_dat3
2074 grep EAS MSL_AFR_*_dat3
2075 grep EAS MSL_AFR_*_dat3 |grep CHR3
2076 grep OCE MSL_AFR_*_dat3 |grep CHR3
2077 history
```

**November 25, 2020**

### **American-specific SNPs**

Studied 8 people from 4 American tribes:

|                             |        |
|-----------------------------|--------|
| grep Kar simon_pops2_A2.txt | 3 inds |
| grep Cha simon_pops2_A2.txt | 1 ind  |
| grep Sur simon_pops2_A2.txt | 2 inds |
| grep Pia simon_pops2_A2.txt | 2 inds |

```
2033 vi AmericanSNPs2020.pl
2034 perl AmericanSNPs2020.pl 1
2035 history
afedorov@bio:~/MAY2020$ pwd
/home/afedorov/MAY2020
afedorov@bio:~/MAY2020$ ls -l AMR*
-rw-rw-r-- 1 afedorov afedorov 36513 ноя 26 05:51 AMR_SNP_1
afedorov@bio:~/MAY2020$ wc AMR*
1111 6666 36513 AMR_SNP_1
```

CONCLUSION: on Chr 1 I found 1111 SNPs that occurred  $\geq 3$  times in 8 americans and nobody else from Simon project

**Changed program. Now the requirements are the following:**

SNPs that occurred  $\geq 3$  times in 8 americans Cha,Kar,Pia,Sur and nobody else outside AMERICA from Simon project. The modified program allows matching also in American populations: May, Mix, Pim, Que, Zap.

```
afedorov@bio:~/MAY2020$ wc AMR*
```

2425 16975 84074 AMR\_SNP1

Final change: I also allowed matching SNPs to ARC populations. The results are the following:

afedorov@bio:~/MAY2020\$ wc AMR\*

3502 31518 136353

afedorov@bio:~/MAY2020\$ more AMR\_SNP1

|    |    |   |    |      |         |             |   |   |  |
|----|----|---|----|------|---------|-------------|---|---|--|
| 6  | 3  | 0 | 9  | CHR1 | 51802   | s1x51802    | C | T |  |
| 6  | 2  | 0 | 8  | CHR1 | 84139   | rs183605470 | A | T |  |
| 3  | 0  | 0 | 3  | CHR1 | 239974  | s1x239974   | C | T |  |
| 4  | 0  | 0 | 4  | CHR1 | 461955  | s1x461955   | G | A |  |
| 4  | 6  | 0 | 10 | CHR1 | 547914  | s1x547914   | G | T |  |
| 4  | 4  | 0 | 8  | CHR1 | 548224  | s1x548224   | C | A |  |
| 5  | 1  | 1 | 7  | CHR1 | 551088  | s1x551088   | G | T |  |
| 4  | 0  | 0 | 4  | CHR1 | 662577  | rs369208112 | A | G |  |
| 8  | 5  | 0 | 13 | CHR1 | 826205  | rs150036925 | G | A |  |
| 3  | 4  | 1 | 8  | CHR1 | 891049  | rs117770195 | C | T |  |
| 8  | 6  | 0 | 14 | CHR1 | 908275  | rs145574509 | G | A |  |
| 8  | 6  | 0 | 14 | CHR1 | 920890  | rs181925002 | A | G |  |
| 3  | 5  | 1 | 9  | CHR1 | 1094888 | rs182013341 | C | T |  |
| 12 | 11 | 2 | 25 | CHR1 | 1124792 | rs143677262 | A | T |  |
| 11 | 12 | 2 | 25 | CHR1 | 1163767 | rs182022102 | C | T |  |
| 12 | 11 | 2 | 25 | CHR1 | 1201632 | rs12402622  | G | A |  |

Where Col1 = S.Amer tribes; Col2 = Mexicans; Col3 = ARC (#alleles)

## November 26, 2020

Now my goal is to take *AMR\_SNP1* data and check the presence of these alleles in 1000G datasets.

*AmericaSpecificSNPs* file:

|             |   |    |   |    |      |         |             |   |   |     |   |   |
|-------------|---|----|---|----|------|---------|-------------|---|---|-----|---|---|
| rs186084397 | 4 | 8  | 0 | 12 | CHR1 | 5995845 | rs186084397 | G | A | 77  | 1 | 1 |
|             | 0 | 0  |   |    |      |         |             |   |   |     |   |   |
| rs146736582 | 4 | 17 | 0 | 21 | CHR1 | 6243367 | rs146736582 | G | A | 102 | 0 | 0 |
|             | 0 | 0  |   |    |      |         |             |   |   |     |   |   |
| rs999262    | 3 | 4  | 1 | 8  | CHR1 | 6360962 | rs999262    | T | A | 24  | 0 | 0 |
|             | 0 | 0  |   |    |      |         |             |   |   |     |   |   |
| rs139864117 | 4 | 7  | 2 | 13 | CHR1 | 6574244 | rs139864117 | C | T | 65  | 0 | 0 |
|             | 0 | 0  |   |    |      |         |             |   |   |     |   |   |
| rs138726316 | 4 | 7  | 2 | 13 | CHR1 | 6582065 | rs138726316 | A | C | 68  | 0 | 0 |
|             | 0 | 0  |   |    |      |         |             |   |   |     |   |   |
| rs147976585 | 4 | 7  | 2 | 13 | CHR1 | 6587762 | rs147976585 | G | A | 68  | 0 | 0 |
|             | 0 | 0  |   |    |      |         |             |   |   |     |   |   |
| rs189128312 | 4 | 7  | 2 | 13 | CHR1 | 6598567 | rs189128312 | A | T | 69  | 0 | 0 |
|             | 0 | 0  |   |    |      |         |             |   |   |     |   |   |
| rs559091938 | 4 | 0  | 0 | 4  | CHR1 | 6870255 | s1x6870255  | T | A | 18  | 1 | 0 |
|             | 0 | 0  |   |    |      |         |             |   |   |     |   |   |
| rs184440184 | 4 | 0  | 0 | 4  | CHR1 | 6949528 | rs184440184 | G | A | 18  | 1 | 1 |
|             | 0 | 0  |   |    |      |         |             |   |   |     |   |   |

IN this output file (*AmericaSpecificSNPs*) the last 5 columns are

- 1) Number of Samr
- 2) Number of Eur
- 3) Number of Asia
- 4) Number of Afr
- 5) Number of Ind

All in all, I got 1558 American-specific SNPs on Chr1 that have rs-IDs and are present in 1000G

*number of nonfound SNPs in 1000G is 979* (those that present in Simons and absent in 1000G)

The present pipeline:

- 1) Step 1: “perl AmericanSNPs2020.pl 1” this command produces the *AMR\_SNP\_1* output file for chromosome 1
- 2) Step 2: “perl AmericanSNPs1000G.pl 1” this program produces the *AmericaSpecificSNPs* output file for chromosome 1.

Finally, I need to look at these American-specific alleles in Estonian project (Maybe they are enriched in Arctic, Siberia, or other populations that may point to the origins of Americans).

## November 27, 2020

```
afedorov@bio:~/MAY2020$ perl AmericanSNPsESTONIA.pl 1
```

```
410    number of items is 402
395    Cac_AMR
336    Wic_AMR
306    Col_AMR
59     Kor_ARC
57     Chu_ARC
51     Esk_ARC
11     EVk_SIB 13inds
11     Bur_SIB 17inds
8      Eve_SIB 8inds
5      Ket_SIB 3inds
4      For_SIB 3inds
3      Sho_SIB 2inds
3      Cro_EUR Croats
3      Sel_SIB 3inds
3      Kyr_CAS 7
3      Sak_SIB 7inds
2      Alt_CAS 6
2      BUm_SAS Burmise Maynamar
2      Udm_EUR 4
2      BSh_EUR 5
2      Vie_EAS 10
2      Kha_SIB 3inds
```

```

2      Tuv_SIB 3inds
2      Kaz_CAS 3
1      Kab_CAU
1      Rus_CAS
1      Agt_OCE
1      Viz_OCE
1      Tat_EUR
1      Mar_EUR
1      Kry_EUR
1      Abk_CAU
1      Baj_OCE
1      Mis_EUR
1      Ish_CAS

```

#### OUTPUT Datafile: **AmericaSpecificSNPsEstonia\_1**

|             |   |   |   |         |         |         |             |   |   |    |   |   |
|-------------|---|---|---|---------|---------|---------|-------------|---|---|----|---|---|
| rs186485779 | 5 | 4 | 1 | 10      | CHR1    | 1605033 | rs186485779 | C | T | 57 | 0 | 0 |
|             | 0 | 0 |   | Wic_AMR | Kor_ARC | Kor_ARC | Kor_ARC     |   |   |    |   |   |
| rs192491441 | 4 | 1 | 0 | 5       | CHR1    | 2046229 | rs192491441 | A | G | 46 | 1 | 0 |
|             | 0 | 0 |   | Col_AMR |         |         |             |   |   |    |   |   |

Starting pipeline for calculation American-specific SNPs:

perl AmericanSNPstart1.pl (running AmericanSNPs2020.pl on 22 Chr)

perl AmericanSNPstart2.pl (running AmericanSNPs1000G.pl on 22 Chr)

#### RESULTS:

```

afedorov@bio:~/MAY2020$ wc AmericaSpecificSNPs_1
 1610  88850 359157 AmericaSpecificSNPs_1
afedorov@bio:~/MAY2020$ wc AmericaSpecificSNPs_2
 1915 103754 419697 AmericaSpecificSNPs_2
afedorov@bio:~/MAY2020$ wc AmericaSpecificSNPs_3
 1354  70857 286362 AmericaSpecificSNPs_3
afedorov@bio:~/MAY2020$ wc AmericaSpecificSNPs_4
 1379  74348 300386 AmericaSpecificSNPs_4
afedorov@bio:~/MAY2020$ wc AmericaSpecificSNPs_5
 1473  78992 319169 AmericaSpecificSNPs_5
afedorov@bio:~/MAY2020$ wc AmericaSpecificSNPs_6
 1198  64048 258707 AmericaSpecificSNPs_6
afedorov@bio:~/MAY2020$ wc AmericaSpecificSNPs_7
 1224  68509 276558 AmericaSpecificSNPs_7
afedorov@bio:~/MAY2020$ wc AmericaSpecificSNPs_8
 1287  65909 266050 AmericaSpecificSNPs_8
afedorov@bio:~/MAY2020$ wc AmericaSpecificSNPs_9
  944  47857 193357 AmericaSpecificSNPs_9
afedorov@bio:~/MAY2020$ wc AmericaSpecificSNPs_10

```

```

1040 57132 231628 AmericaSpecificSNPs_10
afedorov@bio:~/MAY2020$ wc AmericaSpecificSNPs_11
1002 57524 233132 AmericaSpecificSNPs_11
afedorov@bio:~/MAY2020$ wc AmericaSpecificSNPs_12
1018 59249 240071 AmericaSpecificSNPs_12
afedorov@bio:~/MAY2020$ wc AmericaSpecificSNPs_13
697 35887 145622 AmericaSpecificSNPs_13
afedorov@bio:~/MAY2020$ wc AmericaSpecificSNPs_14
750 46215 187111 AmericaSpecificSNPs_14
afedorov@bio:~/MAY2020$ wc AmericaSpecificSNPs_15
655 35858 145374 AmericaSpecificSNPs_15
afedorov@bio:~/MAY2020$ wc AmericaSpecificSNPs_16
691 38029 153979 AmericaSpecificSNPs_16
afedorov@bio:~/MAY2020$ wc AmericaSpecificSNPs_17
575 30815 124792 AmericaSpecificSNPs_17
afedorov@bio:~/MAY2020$ wc AmericaSpecificSNPs_18
604 31308 126776 AmericaSpecificSNPs_18
afedorov@bio:~/MAY2020$ wc AmericaSpecificSNPs_19
375 19712 79872 AmericaSpecificSNPs_19
afedorov@bio:~/MAY2020$ wc AmericaSpecificSNPs_20
408 21751 88048 AmericaSpecificSNPs_20
afedorov@bio:~/MAY2020$ wc AmericaSpecificSNPs_21
273 15228 61649 AmericaSpecificSNPs_21
afedorov@bio:~/MAY2020$ wc AmericaSpecificSNPs_22
273 16454 66597 AmericaSpecificSNPs_22

```

**All in all: I got 20,745 SNPs specific for Native Americans (files AmericaSpecificSNPs\_1..22**

**Conclusion:** We hypothesized that origin of Native Americans may be far older than 25 Kya based on their 20K unique American-specific SNPs and very low Neanderthals. However, about 30% of Native Americans should be more recent admixture (~20Kya) with Arctic and Siberian populations.

**Next goals:**

- 1) Analyze heterozygosity index in Native Americans vs EUR, EAS, etc. from Simons
- 2) Analyze ancient Malta genome (hypothesized ancestor of Americans; Raghavan M. et al Nature 2014, 505(7481):87-91) and other ancient genomes related to relatives of Americans.

October 25, 2021

The present pipeline:

- 1) Step 1: “perl AmericanSNPs2020.pl 10” this command processes Simon VCF dataset file `‘/home/afedorov/simon/simon_chr’.$L.’.gz’` and produces the *AMR\_SNP<sub>s</sub>\_10* output file for chromosome 10
- 2) Step 2: “perl AmericanSNPs1000G.pl 10” this program processes the *AMR\_SNP<sub>s</sub>\_10* file (created at the first step) and VCF for 1000G (`‘/home/afedorov/2500GENOMES/ALL.chr’.$L.’.phase3_shapeit2_mvncall_integrated_v5a.20130502.genotypes.vcf.gz’`) and produces the *AmericaSpecificSNPs\_10* output file for chromosome 10. It counts the occurrences in \$asia; \$eur; \$afr; \$ind; and \$amr populations
- 3) Step 3: “perl AmericanSNPEstonia.pl 10” this program processes the *AmericaSpecificSNPs\_10* file and the Estonian VCF file () and produces the *AmericaSpecificSNPsEstonia\_10* output file for chromosome 10.  
It also produces two additional files: *AmericaSpecificSNPsEstonia2\_10* (most important) and *AmericaSpecificSNPsEstonia3\_10* shown below:

```
afedorov@bio:~/MAY2020$ more AmericaSpecificSNPsEstonia3_22
```

```
53 Cac_AMR
49 Col_AMR
40 Wic_AMR
12 Kor_ARC
7 Chu_ARC
7 Ira_MDE
6 Esk_ARC
3 EVk_SIB
2 Ket_SIB
2 BSh_EUR
2 Tun_SIB
2 Udm_EUR
1 Eve_SIB
1 Alt_CAS
1 Kry_EUR
1 Kyr_CAS
1 Yag_CAS
1 Uyg_CAS
```

```
afedorov@bio:~/MAY2020$ more AmericaSpecificSNPsEstonia2_22
```



```

2063 more AMR_SNP_10
2064 vi OceaniaSimonStep1.pl
2065 perl OceaniaSimonStep1.pl 10
2066 more OCE_SNP_10
2067 history

```

October 28, 2021

Created a new program Oceania1000gStep2new.pl, which keeps SNPs missing in the 1000G.

```

2097 mkdir NOV2021
2098 cd MAY2020/
2099 ls -l *.pl
2100 ls Oce*.pl
2101 cp Oce*.pl ../NOV2021/
2102 ls
2103 cp OCE_S* ../NOV2021/
2104 ls Oce*.pl
2105 vi OceaniaSimonStep1.pl
2106 cp simon_pops2_A2.txt ../NOV2021/
2107 cp ids_simon ../NOV2021/
2108 vi OceaniaSimonStep1.pl
2109 vi Oceania1000gStep2.pl
2110 cp 2504ids ../NOV2021/
2111 vi Oceania1000gStep2.pl
2112 cp igsr_samples.tsv ../NOV2021/
2113 vi OceanEstoniaStep3.pl
2114 cp estonian_pops2_A2.txt ../NOV2021/
2115 cd ../NOV2021/
2116 ls
2117 ls -l
2118 cp Oceania1000gStep2.pl Oceania1000gStep2new.pl
2119 vi Oceania1000gStep2new.pl
2120 perl Oceania1000gStep2new.pl 10
2121 ls -l
2122 wc OCE_SNP_10
2123 wc OceaniaSpecificSNPs_10
2124 head OceaniaSpecificSNPs_10
2125 vi Oceania1000gStep2new.pl
2126 cd ../MAY2020/
2127 ls
2128 head AMR_SNP_7
2129 ls -l *.pl
2130 vi AmericanSNPs1000G.pl
2131 vi AmericanSNPs2020.pl
2132 vi OceaniaSimonStep1.pl
2133 head OCE_SNP_10
2134 head AMR_SNP_7
2135 cd ../NOV2021/
2136 ls
2137 head OCE_SNP_1
2138 history
2139 cd ../MAY2020/
2140 ls
2141 wc AMR_SNP_10
2142 wc AmericaSpecificSNPs_10
2143 cp AmericaSpecificSNPs_10 AMR_SNP_10 ../NOV2021/
2144 ls -l *.pl
2145 cp AmericanSNPs1000G.pl ../NOV2021/
2146 cd ../NOV2021/
2147 ls
2148 perl AmericanSNPs1000G.pl 10
2149 ls
2150 wc AmericaSpecificSNPs_10
2151 wc AMR_SNP_10
2152 wc OceaniaSpecificSNPs_10
2153 vi Oceania1000gStep2new.pl

```



```

2218 more OceaniaSpecificSNPsEstonia2_10
2219 wc OceaniaSpecificSNPsEstonia2_10
2220 top
2221 ls -l *pl
2222 perl OceaniaSNPstart3.pl

```

```

fedorov@bio:~/NOV2021$ wc OceaniaSpecificSNPsEstonia2_1
6033 110372 504191 OceaniaSpecificSNPsEstonia2_1
afedorov@bio:~/NOV2021$ wc OceaniaSpecificSNPsEstonia2_2
4405 79961 365807 OceaniaSpecificSNPsEstonia2_2
afedorov@bio:~/NOV2021$ wc OceaniaSpecificSNPsEstonia2_3
8315 152094 696776 OceaniaSpecificSNPsEstonia2_3
afedorov@bio:~/NOV2021$ wc OceaniaSpecificSNPsEstonia2_4
3959 72393 329838 OceaniaSpecificSNPsEstonia2_4
afedorov@bio:~/NOV2021$ wc OceaniaSpecificSNPsEstonia2_5
4870 88749 406097 OceaniaSpecificSNPsEstonia2_5
afedorov@bio:~/NOV2021$ wc OceaniaSpecificSNPsEstonia2_6
5302 97234 446848 OceaniaSpecificSNPsEstonia2_6
afedorov@bio:~/NOV2021$ wc OceaniaSpecificSNPsEstonia2_7
3189 57782 261710 OceaniaSpecificSNPsEstonia2_7
afedorov@bio:~/NOV2021$ wc OceaniaSpecificSNPsEstonia2_8
3781 69456 316880 OceaniaSpecificSNPsEstonia2_8
afedorov@bio:~/NOV2021$ wc OceaniaSpecificSNPsEstonia2_9
2422 43756 198045 OceaniaSpecificSNPsEstonia2_9
afedorov@bio:~/NOV2021$ wc OceaniaSpecificSNPsEstonia2_10
2289 41743 193560 OceaniaSpecificSNPsEstonia2_10
afedorov@bio:~/NOV2021$ wc OceaniaSpecificSNPsEstonia2_11
2247 40905 190310 OceaniaSpecificSNPsEstonia2_11
afedorov@bio:~/NOV2021$ wc OceaniaSpecificSNPsEstonia2_12
3707 68123 317727 OceaniaSpecificSNPsEstonia2_12
afedorov@bio:~/NOV2021$ wc OceaniaSpecificSNPsEstonia2_13
2340 42413 196920 OceaniaSpecificSNPsEstonia2_13
afedorov@bio:~/NOV2021$ wc OceaniaSpecificSNPsEstonia2_14
3295 59418 272788 OceaniaSpecificSNPsEstonia2_14
afedorov@bio:~/NOV2021$ wc OceaniaSpecificSNPsEstonia2_15
2454 44726 206853 OceaniaSpecificSNPsEstonia2_15
afedorov@bio:~/NOV2021$ wc OceaniaSpecificSNPsEstonia2_16
3253 59354 275244 OceaniaSpecificSNPsEstonia2_16
afedorov@bio:~/NOV2021$ wc OceaniaSpecificSNPsEstonia2_17
2473 45639 212181 OceaniaSpecificSNPsEstonia2_17
afedorov@bio:~/NOV2021$ wc OceaniaSpecificSNPsEstonia2_18
2387 43446 198409 OceaniaSpecificSNPsEstonia2_18
afedorov@bio:~/NOV2021$ wc OceaniaSpecificSNPsEstonia2_19
1981 36241 166428 OceaniaSpecificSNPsEstonia2_19
afedorov@bio:~/NOV2021$ wc OceaniaSpecificSNPsEstonia2_20
2354 42945 197809 OceaniaSpecificSNPsEstonia2_20
afedorov@bio:~/NOV2021$ wc OceaniaSpecificSNPsEstonia2_21
1930 36043 169659 OceaniaSpecificSNPsEstonia2_21
afedorov@bio:~/NOV2021$ wc OceaniaSpecificSNPsEstonia2_22
1448 26928 126393 OceaniaSpecificSNPsEstonia2_22

```

Sum on all chromosomes: **74,434** Oceania Specific SNPs

Which frequency is > 13% in Oceania (5 or more counts among 19 PapuaNewGuinea people) and <0.2% in the rest of the world.

For 25% threshold in Oceania, the counts will be <20,000.

COMMENTS:

- 1) For America-Specific SNPs I used threshold of >18% (3 counts among 8 people), which is higher than for Oceania. Secondly for AmericaSpecific I removed all SNPs missing in 1000G. Some SNPs may be inside areas, not sequenced in 1000G, so we have some underestimations for America.

Now I need to calculate China-Specific SNPs. Here are populations from Simon's project:

```

EAS Cam LP6005441-DNA_H03
EAS Cam LP6005441-DNA_G03
EAS Han SS6004469
EAS Dai SS6004467
EAS Dai LP6005592-DNA_D03
EAS TuX LP6005443-DNA_H01
EAS She LP6005443-DNA_G01
EAS She LP6005443-DNA_F01
EAS Nax LP6005443-DNA_E09
EAS Lah LP6005443-DNA_E01
EAS Xib LP6005443-DNA_C02
EAS Dai LP6005443-DNA_B01
EAS Tuj LP6005443-DNA_A02
EAS YiX LP6005442-DNA_H01
EAS YiX LP6005442-DNA_G01
EAS Xib LP6005442-DNA_D01
EAS Hez LP6005441-DNA_H05
EAS Hez LP6005441-DNA_G05
EAS Tuj LP6005441-DNA_F12
EAS Oro LP6005441-DNA_F09
EAS Mon LP6005441-DNA_F08
EAS Dau LP6005441-DNA_F04
EAS Oro LP6005441-DNA_E09
EAS Mon LP6005441-DNA_E08
EAS TuX LP6005441-DNA_D12
EAS Mia LP6005441-DNA_D08
EAS Han LP6005441-DNA_D05
EAS Dai LP6005441-DNA_D04
EAS Mia LP6005441-DNA_C08
EAS Han LP6005441-DNA_C05
EAS Nax LP6005441-DNA_B09
EAS Lah LP6005441-DNA_B07
EAS XXX LP6005441-DNA_A09
EAS Jap LP6005592-DNA_C02
EAS Jap LP6005441-DNA_D06
EAS Jap LP6005441-DNA_C06
EAS Kor LP6005443-DNA_D06
EAS Kor LP6005443-DNA_C06
EAS Bur LP6005519-DNA_B06
EAS Bur LP6005519-DNA_A06
EAS Ami LP6005443-DNA_G05
EAS Ata LP6005442-DNA_E07
EAS Ami LP6005442-DNA_C07
EAS Tha LP6005443-DNA_B07
EAS Tha LP6005443-DNA_A07
EAS Kin LP6005442-DNA_D11
EAS Kin LP6005442-DNA_C11

```

I will use 22 individuals with > 84% of China (Table 4, Atlas2)

```

afedorov@bio:~/NOV2021$ grep Dai simon_pops2_A2.txt
EAS Dai SS6004467
EAS Dai LP6005592-DNA_D03
EAS Dai LP6005443-DNA_B01
EAS Dai LP6005441-DNA_D04
afedorov@bio:~/NOV2021$ grep Han simon_pops2_A2.txt
EAS Han SS6004469
EAS Han LP6005441-DNA_D05
EAS Han LP6005441-DNA_C05
afedorov@bio:~/NOV2021$ grep Jap simon_pops2_A2.txt
EAS Jap LP6005592-DNA_C02
EAS Jap LP6005441-DNA_D06
EAS Jap LP6005441-DNA_C06
afedorov@bio:~/NOV2021$ grep Kor simon_pops2_A2.txt
EAS Kor LP6005443-DNA_D06
EAS Kor LP6005443-DNA_C06
afedorov@bio:~/NOV2021$ grep Mia simon_pops2_A2.txt
EAS Mia LP6005441-DNA_D08
EAS Mia LP6005441-DNA_C08
afedorov@bio:~/NOV2021$ grep Nax simon_pops2_A2.txt
EAS Nax LP6005443-DNA_E09

```

```

EAS  Nax  LP6005441-DNA_B09
afedorov@bio:~/NOV2021$ grep She simon_pops2_A2.txt
EAS  She  LP6005443-DNA_G01
EAS  She  LP6005443-DNA_F01
afedorov@bio:~/NOV2021$ grep Tuj simon_pops2_A2.txt
EAS  Tuj  LP6005443-DNA_A02
EAS  Tuj  LP6005441-DNA_F12
afedorov@bio:~/NOV2021$ grep YiX simon_pops2_A2.txt
EAS  YiX  LP6005442-DNA_H01
EAS  YiX  LP6005442-DNA_G01

```

The programs are the following:

```

afedorov@bio:~/NOV2021$ cp AmericanSNPs2020.pl ChinaSimonStep1.pl
afedorov@bio:~/NOV2021$ cp AmericanSNPs1000G.pl China1000gStep2.pl
afedorov@bio:~/NOV2021$ cp AmericanSNPsESTONIA.pl ChinaEstoniaStep3.pl

```

I finished calculation of China-Specific SNPs and got surprising results: There are considerably less such CHI-specific SNPs than OCE and AMR-specific ones. Below are possible reasons and explanations.

- 1) At the last (third) step the output of ChinaEstoniaStep3.pl gave <100 CHI-Specific SNPs, while AMR- has 20,000 and OCE- has 74,000. The problem may be that Estonian Database have only a few people from EAS (4 Vietnamese and 2 other EAS individuals). Maybe these EAS has been poorly sequenced, and many China-specific SNPs are missing in Estonian Database. Maybe Vietnamese do not have much CHI-specific (I doubt, because in Atlas2 Vietnamese are 78% CHI). Maybe there is a bug in spelling in the Step1 program. ANYWAY, we should not consider ChinaSpecificSNPsEstonia2\_\$.L files, because they are nearly empty. Instead we should use the output from the previous step: files ChinaSpecificSNPs\_\$.L files, which has in total **2,885** SNPs.
- 2) To clarify the puzzle with very low China-Specific SNPs, I need to analyze only 1000G Dataset and compare CHI-specific vs AMR-specific. Because EAS and AMR are well represented there and the rest populations from 1000G are pretty far from these two groups (no SIB or ARC, etc.). I need to write a special program to do this test based on the AmericanSNPs1000G.pl program.
- 3) Anyway, the results are very strange, taking into account that CHI-group are not related to EUR, MDE, AFR, AMR. It could be a clue to population puzzles.

```

afedorov@bio:~/NOV2021$ wc ChinaSpecificSNPs_1
180 23814 95553 ChinaSpecificSNPs_1
afedorov@bio:~/NOV2021$ wc ChinaSpecificSNPs_2
245 32259 129522 ChinaSpecificSNPs_2
afedorov@bio:~/NOV2021$ wc ChinaSpecificSNPs_3
228 34922 140157 ChinaSpecificSNPs_3
afedorov@bio:~/NOV2021$ wc ChinaSpecificSNPs_4
242 35704 143332 ChinaSpecificSNPs_4
afedorov@bio:~/NOV2021$ wc ChinaSpecificSNPs_5
234 31632 127011 ChinaSpecificSNPs_5
afedorov@bio:~/NOV2021$ wc ChinaSpecificSNPs_6
130 16270 65289 ChinaSpecificSNPs_6
afedorov@bio:~/NOV2021$ wc ChinaSpecificSNPs_7
209 27194 109206 ChinaSpecificSNPs_7
afedorov@bio:~/NOV2021$ wc ChinaSpecificSNPs_8
118 15898 63752 ChinaSpecificSNPs_8
afedorov@bio:~/NOV2021$ wc ChinaSpecificSNPs_9
112 13571 54483 ChinaSpecificSNPs_9
afedorov@bio:~/NOV2021$ wc ChinaSpecificSNPs_10
118 14923 59999 ChinaSpecificSNPs_10
afedorov@bio:~/NOV2021$ wc ChinaSpecificSNPs_11
136 20551 82544 ChinaSpecificSNPs_11
afedorov@bio:~/NOV2021$ wc ChinaSpecificSNPs_12
137 19052 76558 ChinaSpecificSNPs_12

```

```

afedorov@bio:~/NOV2021$ wc ChinaSpecificSNPs_13
 82 11209 44998 ChinaSpecificSNPs_13
afedorov@bio:~/NOV2021$ wc ChinaSpecificSNPs_14
122 16520 66392 ChinaSpecificSNPs_14
afedorov@bio:~/NOV2021$ wc ChinaSpecificSNPs_15
154 28353 113896 ChinaSpecificSNPs_15
afedorov@bio:~/NOV2021$ wc ChinaSpecificSNPs_16
135 21764 87423 ChinaSpecificSNPs_16
afedorov@bio:~/NOV2021$ wc ChinaSpecificSNPs_17
 58 7537 30276 ChinaSpecificSNPs_17
afedorov@bio:~/NOV2021$ wc ChinaSpecificSNPs_18
 64 8532 34264 ChinaSpecificSNPs_18
afedorov@bio:~/NOV2021$ wc ChinaSpecificSNPs_19
 55 7295 29298 ChinaSpecificSNPs_19
afedorov@bio:~/NOV2021$ wc ChinaSpecificSNPs_20
 67 8482 34055 ChinaSpecificSNPs_20
afedorov@bio:~/NOV2021$ wc ChinaSpecificSNPs_21
19 2444 9818 ChinaSpecificSNPs_21
afedorov@bio:~/NOV2021$ wc ChinaSpecificSNPs_22
 40 5468 21975 ChinaSpecificSNPs_22

```

## October 31, 2021

Starting AFR-Specific SNP calculations.

```

afedorov@bio:~/NOV2021$ cp AmericanSNPs2020.pl AfricaSimonStep1.pl
afedorov@bio:~/NOV2021$ cp AmericanSNPs1000G.pl Africa1000gStep2.pl
afedorov@bio:~/NOV2021$ cp AmericanSNPsESTONIA.pl AfricaEstoniaStep3.pl

```

checking AFR populations

```

afedorov@bio:~/NOV2021$ grep Gam simon_pops2_A2.txt
AFR Gam LP6005442-DNA_H10
AFR Gam LP6005442-DNA_G10
afedorov@bio:~/NOV2021$ grep Luo simon_pops2_A2.txt
AFR Luo LP6005677-DNA_G01
AFR Luo LP6005442-DNA_F09
afedorov@bio:~/NOV2021$ grep Mas simon_pops2_A2.txt
AFR Mas LP6005443-DNA_F06
AFR Mas LP6005443-DNA_E06
afedorov@bio:~/NOV2021$ grep Luh simon_pops2_A2.txt
AFR Luh LP6005442-DNA_F11
AFR Luh LP6005442-DNA_E11
afedorov@bio:~/NOV2021$ grep Som simon_pops2_A2.txt
AFR Som LP6005442-DNA_D09
afedorov@bio:~/NOV2021$ grep JuX simon_pops2_A2.txt
AFR JuX SS6004473
AFR JuX LP6005443-DNA_G08
AFR JuX LP6005441-DNA_B11
AFR JuX LP6005441-DNA_A11
afedorov@bio:~/NOV2021$ grep Yor simon_pops2_A2.txt
AFR Yor SS6004475
AFR Yor LP6005442-DNA_B02
AFR Yor LP6005442-DNA_A02
afedorov@bio:~/NOV2021$ grep Esa simon_pops2_A2.txt
AFR Esa LP6005442-DNA_B10
AFR Esa LP6005442-DNA_A10
afedorov@bio:~/NOV2021$ grep Man simon_pops2_A2.txt
SIB Man LP6005443-DNA_G04
SIB Man LP6005443-DNA_F04
AFR Man SS6004470
AFR Man LP6005441-DNA_F07
AFR Man LP6005441-DNA_E07
afedorov@bio:~/NOV2021$ grep Men simon_pops2_A2.txt
AFR Men LP6005442-DNA_H11
AFR Men LP6005442-DNA_G11
afedorov@bio:~/NOV2021$ grep Kho simon_pops2_A2.txt
SAS Kho LP6005519-DNA_E05
AFR Kho LP6005677-DNA_D03

```

```

AFR  Kho  LP6005592-DNA_C05
afedorov@bio:~/NOV2021$ grep Din  simon_pops2_A2.txt
AFR  Din  SS6004480
AFR  Din  LP6005443-DNA_H08
AFR  Din  LP6005443-DNA_B09
afedorov@bio:~/NOV2021$ grep Sah  simon_pops2_A2.txt
AFR  Sah  LP6005619-DNA_C01
AFR  Sah  LP6005619-DNA_B01
afedorov@bio:~/NOV2021$ grep Mbu  simon_pops2_A2.txt
AFR  Mbu  SS6004471
AFR  Mbu  LP6005592-DNA_C03
AFR  Mbu  LP6005441-DNA_B08
AFR  Mbu  LP6005441-DNA_A08
afedorov@bio:~/NOV2021$ grep Bia  simon_pops2_A2.txt
AFR  Bia  LP6005441-DNA_H02
AFR  Bia  LP6005441-DNA_G02
afedorov@bio:~/NOV2021$ grep Ban  simon_pops2_A2.txt
AFR  Ban  LP6005443-DNA_G02
AFR  Ban  LP6005443-DNA_F02
AFR  Ban  LP6005443-DNA_E02
AFR  Ban  LP6005441-DNA_F01
AFR  Ban  LP6005443-DNA_A01
AFR  Ban  LP6005441-DNA_B02
afedorov@bio:~/NOV2021$ grep Moz  simon_pops2_A2.txt
AFR  Moz  LP6005441-DNA_H08
AFR  Moz  LP6005441-DNA_G08

```

There are duplicates from other continents in Kho and Man

#### HISTORY:

```

2164 grep Cam  simon_pops2_A2.txt history
2165 history
2166 vi ChinaSimonStep1.pl
2167 vi AfricaSimonStep1.pl
2168 perl AfricaSimonStep1.pl 10
2169 ls
2170 wc AFR_SNPs_10
2171 vi AfricaSimonStep1.pl
2172 perl AfricaSimonStep1.pl 10
2173 wc AFR_SNPs_10
2174 ls -l *pl
2175 cp AmericanSNPstart1.pl
2176 cp AmericanSNPstart1.pl  AfricanSNPstart1.pl
2177 vi AfricanSNPstart1.pl
2178 perl AfricanSNPstart1.pl
2179 top
2180 ls
2181 vi Africa1000gStep2.pl
2182 perl Africa1000gStep2.pl 10
2183 ls
2184 wc AfricanSpecificSNPs_10
2185 ls -l Afr*
2186 vi Africa1000gStep2.pl
2187 perl Africa1000gStep2.pl 10
2188 ls
2189 wc AfricanSpecificSNPs_10
2190 ls -S AfricanSpecificSNPs_10
2191 less -S AfricanSpecificSNPs_10
2192 vi Africa1000gStep2.pl
2193 perl Africa1000gStep2.pl 10
2194 wc AfricanSpecificSNPs_10
2195 less -S AfricanSpecificSNPs_10
2196 ls -l *pl
2197 cp ChinaSNPstart2.pl  AfricaSNPstart2.pl
2198 vi  AfricaSNPstart2.pl
2199 perl  AfricaSNPstart2.pl
2200 ls
2201 wc AfricanSpecificSNPs_1
2202 wc AfricanSpecificSNPs_2

```

```

2203 wc AfricanSpecificSNPs_3
2204 wc AfricanSpecificSNPs_4
2205 wc AfricanSpecificSNPs_10
2206 ls -l *.pl
2207 cp AmericanSNPsESTONIA.pl AfricanSNPsESTONIA.pl
2208 vi AfricanSNPsESTONIA.pl
2209 perl AfricanSNPsESTONIA.pl 10
2210 ls
2211 wc AfricanSpecificSNPsEstonia_10
2212 less -S AfricanSpecificSNPsEstonia_10
2213 ls -l *.pl
2214 cp AmericanSNPstart3.pl AfricanSNPstart3.pl
2215 vi AfricanSNPstart3.pl
2216 perl AfricanSNPstart3.pl

```

Ok. I finished AFR calculations. At this stage it is impossible to compare AFR, OCE, and AMR results because they have different thresholds for allele frequencies to be region-specific. It starts from Step1 for Simons calculations. The number of individuals from AFR, OCE, and AMR is different and their purity may vary. For Africans I chose 22 counts for 47 AFR Simon individuals, which is pretty high. At the end I got 31,943 African-specific SNPs.

```

afedorov@bio:~/NOV2021$ wc AfricanSpecificSNPsEstonia_1
2382 40454 189798 AfricanSpecificSNPsEstonia_1
afedorov@bio:~/NOV2021$ wc AfricanSpecificSNPsEstonia_2
2863 48374 226793 AfricanSpecificSNPsEstonia_2
afedorov@bio:~/NOV2021$ wc AfricanSpecificSNPsEstonia_3
2549 42892 199679 AfricanSpecificSNPsEstonia_3
afedorov@bio:~/NOV2021$ wc AfricanSpecificSNPsEstonia_4
2206 37154 173399 AfricanSpecificSNPsEstonia_4
afedorov@bio:~/NOV2021$ wc AfricanSpecificSNPsEstonia_5
2265 38545 181084 AfricanSpecificSNPsEstonia_5
afedorov@bio:~/NOV2021$ wc AfricanSpecificSNPsEstonia_6
1430 24206 112818 AfricanSpecificSNPsEstonia_6
afedorov@bio:~/NOV2021$ wc AfricanSpecificSNPsEstonia_7
1654 27987 131041 AfricanSpecificSNPsEstonia_7
afedorov@bio:~/NOV2021$ wc AfricanSpecificSNPsEstonia_8
2173 36953 173368 AfricanSpecificSNPsEstonia_8
afedorov@bio:~/NOV2021$ wc AfricanSpecificSNPsEstonia_9
1574 26694 124709 AfricanSpecificSNPsEstonia_9
afedorov@bio:~/NOV2021$ wc AfricanSpecificSNPsEstonia_10
1274 21384 100533 AfricanSpecificSNPsEstonia_10
afedorov@bio:~/NOV2021$ wc AfricanSpecificSNPsEstonia_11
1527 25620 120063 AfricanSpecificSNPsEstonia_11
afedorov@bio:~/NOV2021$ wc AfricanSpecificSNPsEstonia_12
1220 20738 98603 AfricanSpecificSNPsEstonia_12
afedorov@bio:~/NOV2021$ wc AfricanSpecificSNPsEstonia_13
741 12488 58756 AfricanSpecificSNPsEstonia_13
afedorov@bio:~/NOV2021$ wc AfricanSpecificSNPsEstonia_14
1053 17753 83766 AfricanSpecificSNPsEstonia_14
afedorov@bio:~/NOV2021$ wc AfricanSpecificSNPsEstonia_15
1084 18268 85909 AfricanSpecificSNPsEstonia_15
afedorov@bio:~/NOV2021$ wc AfricanSpecificSNPsEstonia_16
1167 19871 93717 AfricanSpecificSNPsEstonia_16
afedorov@bio:~/NOV2021$ wc AfricanSpecificSNPsEstonia_17
1272 21639 101730 AfricanSpecificSNPsEstonia_17
afedorov@bio:~/NOV2021$ wc AfricanSpecificSNPsEstonia_18
723 12147 56629 AfricanSpecificSNPsEstonia_18
afedorov@bio:~/NOV2021$ wc AfricanSpecificSNPsEstonia_19
809 13602 63760 AfricanSpecificSNPsEstonia_19
afedorov@bio:~/NOV2021$ wc AfricanSpecificSNPsEstonia_20
815 13816 64615 AfricanSpecificSNPsEstonia_20
afedorov@bio:~/NOV2021$ wc AfricanSpecificSNPsEstonia_21
669 11321 53298 AfricanSpecificSNPsEstonia_21
afedorov@bio:~/NOV2021$ wc AfricanSpecificSNPsEstonia_22
493 8331 39125 AfricanSpecificSNPsEstonia_22

```

COMPARISONS of the results for AFR, AMR, CHI, OCE:

- 1) ~~AFR 23 counts out of 47 people: THRESHOLD 24.5%. 31.9K~~
- 2) AFR 17 counts out of 47 people: THRESHOLD 18.1%. 124.4K
- 3) AMR 3 counts out of 8 people: THRESHOLD 18.75% 20.7K
- 4) ~~OCE 5 counts out of 19 people: THRESHOLD 13.2% 74.4K~~
- 5) OCE 7 counts out of 19 people: THRESHOLD 18.4% 37.6K
- 6) CHI 8 counts out of 22 people: THRESHOLD 18.2% 2.9K

| Geographical Region | # Specific SNPs |
|---------------------|-----------------|
| Americas            | 20,700          |
| Oceania             | 37,600          |
| Africa              | 124,000         |
| East Asia           | 2,900           |

```

afedorov@bio:~/NOV2021$ wc OceaniaSpecificSNPsEstonia_1
 3203  55546 261833 OceaniaSpecificSNPsEstonia_1
afedorov@bio:~/NOV2021$ wc OceaniaSpecificSNPsEstonia_2
 2158  37173 174841 OceaniaSpecificSNPsEstonia_2
afedorov@bio:~/NOV2021$ wc OceaniaSpecificSNPsEstonia_3
 4538  78403 369980
OceaniaSpecificSNPsEstonia_3
afedorov@bio:~/NOV2021$ wc OceaniaSpecificSNPsEstonia_4
 1857  32061 150153 OceaniaSpecificSNPsEstonia_4
afedorov@bio:~/NOV2021$ wc OceaniaSpecificSNPsEstonia_5
 2156  36988 173666 OceaniaSpecificSNPsEstonia_5
afedorov@bio:~/NOV2021$ wc OceaniaSpecificSNPsEstonia_6
 3027  52514 247959 OceaniaSpecificSNPsEstonia_6
afedorov@bio:~/NOV2021$ wc OceaniaSpecificSNPsEstonia_7
 1466  25333 118605 OceaniaSpecificSNPsEstonia_7
afedorov@bio:~/NOV2021$ wc OceaniaSpecificSNPsEstonia_8
 1863  32174 150937 OceaniaSpecificSNPsEstonia_8
afedorov@bio:~/NOV2021$ wc OceaniaSpecificSNPsEstonia_9
 1154  19620 90969 OceaniaSpecificSNPsEstonia_9
afedorov@bio:~/NOV2021$ wc OceaniaSpecificSNPsEstonia_10
 1032  17780 84846 OceaniaSpecificSNPsEstonia_10
afedorov@bio:~/NOV2021$ wc OceaniaSpecificSNPsEstonia_11
 969  16641 79641 OceaniaSpecificSNPsEstonia_11
afedorov@bio:~/NOV2021$ wc OceaniaSpecificSNPsEstonia_12
 2163  37337 178779 OceaniaSpecificSNPsEstonia_12
afedorov@bio:~/NOV2021$ wc OceaniaSpecificSNPsEstonia_13
 1116  19156 91414 OceaniaSpecificSNPsEstonia_13
afedorov@bio:~/NOV2021$ wc OceaniaSpecificSNPsEstonia_14
 1763  29942 141239 OceaniaSpecificSNPsEstonia_14
afedorov@bio:~/NOV2021$ wc OceaniaSpecificSNPsEstonia_15
 1199  20910 100064 OceaniaSpecificSNPsEstonia_15
afedorov@bio:~/NOV2021$ wc OceaniaSpecificSNPsEstonia_16
 1911  32826 156041 OceaniaSpecificSNPsEstonia_16
afedorov@bio:~/NOV2021$ wc OceaniaSpecificSNPsEstonia_17
 1110  19232 91589 OceaniaSpecificSNPsEstonia_17
afedorov@bio:~/NOV2021$ wc OceaniaSpecificSNPsEstonia_18
 1147  19503 91477 OceaniaSpecificSNPsEstonia_18
afedorov@bio:~/NOV2021$ wc OceaniaSpecificSNPsEstonia_19
 1061  18190 85384 OceaniaSpecificSNPsEstonia_19
afedorov@bio:~/NOV2021$ wc OceaniaSpecificSNPsEstonia_20
 1024  17623 83430 OceaniaSpecificSNPsEstonia_20
afedorov@bio:~/NOV2021$ wc OceaniaSpecificSNPsEstonia_21
 962  16921 81287 OceaniaSpecificSNPsEstonia_21
afedorov@bio:~/NOV2021$ wc OceaniaSpecificSNPsEstonia_22
 749  13057 62701 OceaniaSpecificSNPsEstonia_22

```

Total for the new threshold is 37,625

Now I recalculated AFR for the common threshold of 18.1%

```
afedorov@bio:~/NOV2021$ wc AfricanSpecificSNPsEstonia_1
10057 168231 781184 AfricanSpecificSNPsEstonia_1
afedorov@bio:~/NOV2021$ wc AfricanSpecificSNPsEstonia_2
11484 191058 885057 AfricanSpecificSNPsEstonia_2
afedorov@bio:~/NOV2021$ wc AfricanSpecificSNPsEstonia_3
9230 153540 708534 AfricanSpecificSNPsEstonia_3
afedorov@bio:~/NOV2021$ wc AfricanSpecificSNPsEstonia_4
8483 140647 648836 AfricanSpecificSNPsEstonia_4
afedorov@bio:~/NOV2021$ wc AfricanSpecificSNPsEstonia_5
7972 133689 621183 AfricanSpecificSNPsEstonia_5
afedorov@bio:~/NOV2021$ wc AfricanSpecificSNPsEstonia_6
6052 101400 469127 AfricanSpecificSNPsEstonia_6
afedorov@bio:~/NOV2021$ wc AfricanSpecificSNPsEstonia_7
6929 115097 531173 AfricanSpecificSNPsEstonia_7
afedorov@bio:~/NOV2021$ wc AfricanSpecificSNPsEstonia_8
7691 128391 593997 AfricanSpecificSNPsEstonia_8
afedorov@bio:~/NOV2021$ wc AfricanSpecificSNPsEstonia_9
5815 96815 446073 AfricanSpecificSNPsEstonia_9
afedorov@bio:~/NOV2021$ wc AfricanSpecificSNPsEstonia_10
5340 88416 411760 AfricanSpecificSNPsEstonia_10
afedorov@bio:~/NOV2021$ wc AfricanSpecificSNPsEstonia_11
5948 98437 457231 AfricanSpecificSNPsEstonia_11
afedorov@bio:~/NOV2021$ wc AfricanSpecificSNPsEstonia_12
5435 90227 421785 AfricanSpecificSNPsEstonia_12
afedorov@bio:~/NOV2021$ wc AfricanSpecificSNPsEstonia_13
3389 56645 264726 AfricanSpecificSNPsEstonia_13
afedorov@bio:~/NOV2021$ wc AfricanSpecificSNPsEstonia_14
4109 68167 317654 AfricanSpecificSNPsEstonia_14
afedorov@bio:~/NOV2021$ wc AfricanSpecificSNPsEstonia_15
4173 69393 322752 AfricanSpecificSNPsEstonia_15
afedorov@bio:~/NOV2021$ wc AfricanSpecificSNPsEstonia_16
4804 80245 373336 AfricanSpecificSNPsEstonia_16
afedorov@bio:~/NOV2021$ wc AfricanSpecificSNPsEstonia_17
4205 70556 328850 AfricanSpecificSNPsEstonia_17
afedorov@bio:~/NOV2021$ wc AfricanSpecificSNPsEstonia_18
2960 49195 227447 AfricanSpecificSNPsEstonia_18
afedorov@bio:~/NOV2021$ wc AfricanSpecificSNPsEstonia_19
2965 49412 230208 AfricanSpecificSNPsEstonia_19
afedorov@bio:~/NOV2021$ wc AfricanSpecificSNPsEstonia_20
2922 48390 222559 AfricanSpecificSNPsEstonia_20
afedorov@bio:~/NOV2021$ wc AfricanSpecificSNPsEstonia_21
2377 39552 183834 AfricanSpecificSNPsEstonia_21
afedorov@bio:~/NOV2021$ wc AfricanSpecificSNPsEstonia_22
2106 34907 161567 AfricanSpecificSNPsEstonia_22
```

Total number of AFR-specific SNPs is 124,446

## November 8, 2021

Calculation of China-specific SNPs via 1000G only

HISTORY:

```
vi PopChiSNPstart.pl
2137 perl PopChiSNPstart.pl
2138 ls -l no*
2139 wc no*
2140 top
2141 ls -l Pop*
2142 more PopulationSpecificSNPsCHI180_15
2143 sort -k4 -n PopulationSpecificSNPsCHI180_15
2144 wc PopulationSpecificSNPsCHI180_15
2145 top
```

```

2146 ls
2147 vi AmericanSNPs2020.pl
2148 pwd
2149 vi AmericanSNPstart1.pl
2150 perl AmericanSNPstart1.pl
2151 top
2152 ls
2153 vi AmericanSNPs1000G.pl
2154 vi AmericanSNPstart2.pl
2155 top
2156 perl AmericanSNPstart2.pl
2157 top
2158 ls
2159 viAmericanSNPsESTONIA.pl
2160 vi AmericanSNPsESTONIA.pl
2161 ls
2162 vi AmericanSNPstart3.pl
2163 top
2164 perl AmericanSNPstart3.pl
2165 top
2166 ls -l Pop*
2167 top
2168 ls
2169 ls -l AmericaSpecificSNPsEstonia2*
2170 less -S AmericaSpecificSNPsEstonia2_1
2171 less -S AmericaSpecificSNPsEstonia2_2
2172 sort -k1 -n AmericaSpecificSNPsEstonia2_2
2173 less -S AmericaSpecificSNPsEstonia2_2
2174 sort -k2 -n AmericaSpecificSNPsEstonia2_2 |less -S
2175 ls AmericaSpecificSNPsEstonia2*
2176 ls AmericaSpecificSNPsEstonia2* >AmericaSpecificAll_Nov8
2177 vi AmericaSpecificAll_Nov8
2203 cat PopulationSpecificSNPsCHI180_1 PopulationSpecificSNPsCHI180_2
PopulationSpecificSNPsCHI180_3 PopulationSpecificSNPsCHI180_4 PopulationSpecificSNPsCHI180_5
PopulationSpecificSNPsCHI180_6 PopulationSpecificSNPsCHI180_7 PopulationSpecificSNPsCHI180_8
PopulationSpecificSNPsCHI180_9 PopulationSpecificSNPsCHI180_10 PopulationSpecificSNPsCHI180_11
PopulationSpecificSNPsCHI180_12 PopulationSpecificSNPsCHI180_13 PopulationSpecificSNPsCHI180_14
PopulationSpecificSNPsCHI180_15 PopulationSpecificSNPsCHI180_16 PopulationSpecificSNPsCHI180_17
PopulationSpecificSNPsCHI180_18 PopulationSpecificSNPsCHI180_19 PopulationSpecificSNPsCHI180_20
PopulationSpecificSNPsCHI180_21 PopulationSpecificSNPsCHI180_22 >
PopulationSpecificSNPsCHI180_ALL
2204 sort -k4 -n PopulationSpecificSNPsCHI180_ALL
2205 wc PopulationSpecificSNPsCHI180_ALL

```

afedorov@bio:~/NOV2021\$ wc PopulationSpecificSNPsCHI180\_ALL  
2427 16923 81881 PopulationSpecificSNPsCHI180\_ALL

The threshold for CHI-specific was 18% (180 counts among 5 EAS populations)  
The latest China-specific was 2,427 similar to 2.9K in the previous calculations on Simon, Estonia and 1000G.

The problem for AMR-specific is that we have a few pure Native American people (8 in total if (/Cha|Kar|Sur|Pia/))

Then we have 14 admixed Native Americans (/May|Mix|Pim|Que|Zap/) ) average 72% AMR genetic background, which is equivalent to 10 pure Native American genomes.

We may put more restrictions (for example: 4>= counts of the AMR specific SNPs for the second group)

In the new program purgeNativeAmericanSNPs.pl, I put the restrictions for group1 + group2 >=7 (corresponds to 19%), Plus, I add that AMR counts in 1000G >20.

With these restrictions I got **3152 AMR-specific SNPs**

```
#!/usr/local/perl
$c=$c2=0;
open(IN, "AmericanSpecificALL_Nov8") || die "Can't open OUTPUT : $!\n";
while(<IN>) {
    chomp($_);
    @b=split(/\t/, $_);
    $POS{$b[5]}=1;
    if (($b[1]+ $b[2])>=7 && $b[10]>=20 ) {
        print "$b[1]\t$b[2]\t$b[10]\n";
        $c++;
    }
    if ($b[10] <4) {$c2++;
        #print "$_\n"; #here I got ~150 SNPs absent in 1000G (no RS-ids)
    }
}
print "$c\t$c2 \n";
```

**November 11, 2021**

Verification of the results:

CHI-specific SNPs:

```
afedorov@bio:~/NOV2021$ sort -k4 -n PopulationSpecificSNPsCHI180_ALL
....
rs5758520 2 0 390 0 24 42356482
rs74616308 2 0 390 0 24 42365682
rs76493153 2 3 390 0 21 89719120
rs78751799 2 3 390 0 21 89721655
rs79681023 2 3 390 0 21 89721667
rs10428005 2 0 391 0 20 42441213
rs5751201 2 0 391 0 22 42410842
rs5758554 2 0 391 0 20 42434621
rs78809963 2 3 391 0 21 89726336
rs76607656 2 3 392 0 21 89723704
rs79802711 1 5 418 0 21 133043841
rs76470826 0 1 428 0 5 28216972
rs1800414 0 0 429 0 4 28197037
rs76930569 0 0 429 0 4 28196145
rs75295597 0 0 430 0 9 28227926
rs78456448 0 0 447 0 0 100080311
rs75721934 0 0 451 0 1 100142780
(see Ensemble browser screenshot below for the last highlighted SNP
```

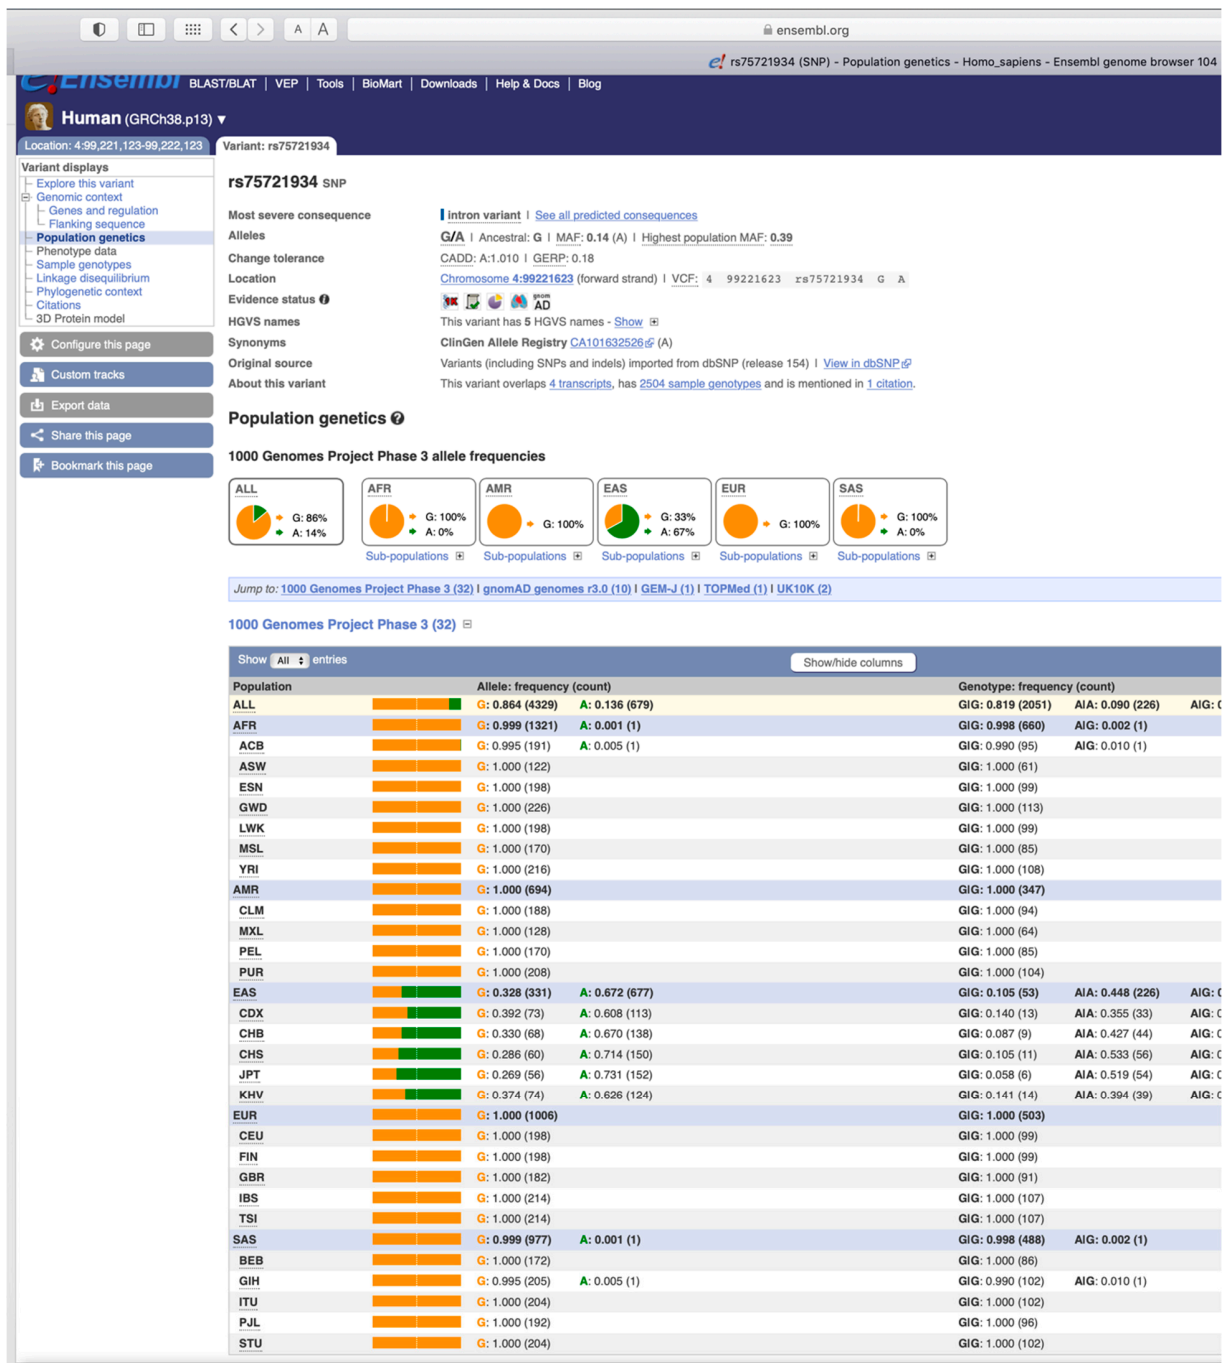

Conclusion: I verified ~ 10 random CHI-specific SNPs with Ensembl, and all of them are EAS-specific. The frequencies in Ensembl were always >10% higher than my calculations. For example for this rs75721934 SNP in the picture, my frequency is 451 / (431 x2) =52.3%. I also took into account non-perfect EAS ancestry by calculation adjustment:  
JPT 104 individuals 90% = 93.6 adjusted individuals  
KHV 99 x 81% =79.2 inds  
CDX 93 x 85% =79.9

CHB 103 x 86% = 88.6

CHS 105 x 0.87% = 91.3

Sum of EAS adjusted individuals is 431

I think that Ensemble uses more recent versions of 1000G that have more SNPs compared to my phase3 from ~ 5 years ago.

AMR-specific SNPs verification:

```
afedorov@bio:~/NOV2021$ sort -k2 -n AmericanSpecificALL_Nov8 |less -S
```

I sorted the AMR-specific SNPs :

|             |    |    |   |   |       |           |             |   |   |     |   |   |   |   |     |     |     |     |
|-------------|----|----|---|---|-------|-----------|-------------|---|---|-----|---|---|---|---|-----|-----|-----|-----|
| rs149138531 | 10 | 3  | 1 | 0 | CHR3  | 43692169  | rs149138531 | C | A | 59  | 0 | 0 | 1 | 0 | PUR | PUR | PUR | PUR |
| rs150420755 | 10 | 4  | 1 | 0 | CHR3  | 43765460  | rs150420755 | T | C | 56  | 0 | 0 | 1 | 0 | PUR | PUR | CLM | CLM |
| rs181969862 | 10 | 4  | 0 | 0 | CHR5  | 139927228 | rs181969862 | C | G | 53  | 0 | 0 | 0 | 0 | PUR | PUR | PUR | PUR |
| rs182746236 | 10 | 2  | 1 | 0 | CHR8  | 144578359 | rs182746236 | C | T | 55  | 0 | 0 | 0 | 0 | PUR | PUR | CLM | CLM |
| rs185167736 | 10 | 0  | 0 | 0 | CHR13 | 109018802 | rs185167736 | A | G | 24  | 0 | 0 | 0 | 0 | CLM | CLM | CLM | PUR |
| rs186957903 | 10 | 2  | 1 | 0 | CHR8  | 144563585 | rs186957903 | C | T | 53  | 0 | 0 | 0 | 0 | PUR | PUR | CLM | CLM |
| rs187933875 | 10 | 3  | 0 | 0 | CHR2  | 55113738  | rs187933875 | G | A | 39  | 0 | 0 | 0 | 0 | PUR | PUR | PUR | PUR |
| rs188012763 | 10 | 1  | 0 | 0 | CHR12 | 102309487 | rs188012763 | G | A | 11  | 0 | 1 | 0 | 0 | PUR | PUR | CLM | CLM |
| rs188143812 | 10 | 1  | 1 | 0 | CHR3  | 4943516   | rs188143812 | G | T | 31  | 0 | 1 | 0 | 1 | PUR | PUR | PUR | PUR |
| rs189392845 | 10 | 5  | 0 | 0 | CHR13 | 34004204  | rs189392845 | G | A | 39  | 0 | 1 | 0 | 0 | PUR | PUR | PUR | PUR |
| rs189980011 | 10 | 8  | 0 | 0 | CHR1  | 39422598  | rs189980011 | C | T | 76  | 0 | 0 | 0 | 0 | PUR | PUR | CLM | CLM |
| rs192181860 | 10 | 4  | 0 | 0 | CHR11 | 114588103 | rs192181860 | C | T | 41  | 0 | 0 | 0 | 0 | PUR | PUR | CLM | CLM |
| rs192192450 | 10 | 2  | 1 | 1 | CHR6  | 94784299  | rs192192450 | G | A | 40  | 0 | 1 | 0 | 0 | PUR | PUR | PUR | PUR |
| rs192854042 | 10 | 8  | 0 | 0 | CHR1  | 39415060  | rs192854042 | C | G | 75  | 0 | 0 | 0 | 0 | PUR | PUR | CLM | CLM |
| rs4861299   | 10 | 4  | 0 | 0 | CHR4  | 40335023  | rs4861299   | C | T | 46  | 0 | 0 | 0 | 0 | CLM | CLM | CLM | PUR |
| rs12476847  | 11 | 12 | 1 | 0 | CHR2  | 164002001 | rs12476847  | C | G | 114 | 1 | 0 | 1 | 0 | PUR | PUR | PUR | PUR |
| rs138262411 | 11 | 8  | 0 | 0 | CHR5  | 139193402 | rs138262411 | G | A | 54  | 0 | 0 | 0 | 0 | PUR | PUR | PUR | PUR |
| rs140471724 | 11 | 5  | 0 | 0 | CHR8  | 108820970 | rs140471724 | G | A | 39  | 0 | 0 | 0 | 0 | PUR | PUR | PUR | PUR |
| rs141251427 | 11 | 2  | 0 | 0 | CHR1  | 88866681  | rs141251427 | A | G | 26  | 0 | 0 | 0 | 0 | CLM | CLM | CLM | CLM |
| rs145730875 | 11 | 1  | 0 | 0 | CHR8  | 51993585  | rs145730875 | T | C | 36  | 0 | 0 | 0 | 0 | PUR | PUR | PUR | PUR |
| rs12453180  | 12 | 5  | 0 | 0 | CHR17 | 77707453  | rs12453180  | T | C | 59  | 0 | 0 | 0 | 0 | PUR | PUR | PUR | CLM |
| rs138541449 | 12 | 14 | 1 | 0 | CHR2  | 164088448 | rs138541449 | T | G | 116 | 0 | 0 | 1 | 0 | PUR | PUR | PUR | PUR |
| rs139100995 | 12 | 4  | 3 | 0 | CHR13 | 101295050 | rs139100995 | C | T | 74  | 0 | 0 | 0 | 0 | PUR | PUR | PUR | PUR |
| rs150480779 | 12 | 4  | 0 | 0 | CHR5  | 139636352 | rs150480779 | C | T | 54  | 1 | 0 | 0 | 0 | FIN | PUR | PUR | PUR |
| rs189842535 | 13 | 4  | 0 | 0 | CHR10 | 85001023  | rs189842535 | T | G | 31  | 0 | 0 | 0 | 0 | PUR | PUR | PUR | PUR |
| rs139106598 | 14 | 9  | 1 | 0 | CHR12 | 75253681  | rs139106598 | T | C | 50  | 1 | 0 | 0 | 0 | GBR | PUR | PUR | PUR |

(END)

Below is the Ensemble verification of the last SNP rs139106598:

The frequency in 1000G is low ~7% because of the huge admixture in AMR populations.

The columns 2 and 3 shows counts in Simons' project and they are > 50%.

All in all, the AMR-specific SNPs are true!

## rs139106598 SNP

Most severe consequence

intergenic variant

Alleles

T/C | Ancestral: T | MAF: 0.01 (C) | Highest population MAF: 0.13

Change tolerance

CADD: C:2.751 | GERP: -1.78

Location

Chromosome 12:74859901 (forward strand) | VCF: 12 74859901 rs139106598 T C

Evidence status

gnomAD

HGVS name

NC\_000012.12:g.74859901T>C

Synonyms

ClinGen Allele Registry CA239857161 (C)

Original source

Variants (including SNPs and indels) imported from dbSNP (release 154) | [View in dbSNP](#)

About this variant

This variant has [2504 sample genotypes](#).

## Population genetics

### 1000 Genomes Project Phase 3 allele frequencies

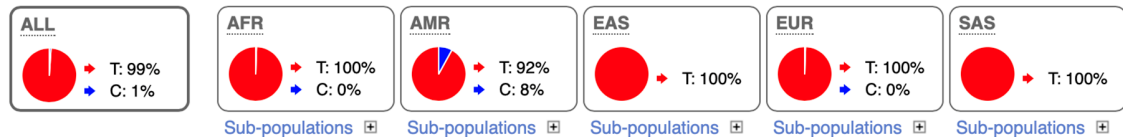

Jump to: [1000 Genomes Project Phase 3 \(32\)](#) | [gnomAD genomes r3.0 \(10\)](#) | [NCBI ALFA \(10\)](#) | [TOPMed \(1\)](#)

### 1000 Genomes Project Phase 3 (32)

| Show       | All                       | entries       | Show/hide columns   |
|------------|---------------------------|---------------|---------------------|
| Population | Allele: frequency (count) |               | Genotype: frequency |
| ALL        | T: 0.989 (4952)           | C: 0.011 (56) | TIT: 0.979 (2452)   |
| AFR        | T: 0.999 (1321)           | C: 0.001 (1)  | TIT: 0.998 (660)    |
| ACB        | T: 1.000 (192)            |               | TIT: 1.000 (96)     |
| ASW        | T: 0.992 (121)            | C: 0.008 (1)  | TIT: 0.984 (60)     |
| ESN        | T: 1.000 (198)            |               | TIT: 1.000 (99)     |
| GWD        | T: 1.000 (226)            |               | TIT: 1.000 (113)    |
| LWK        | T: 1.000 (198)            |               | TIT: 1.000 (99)     |
| MSL        | T: 1.000 (170)            |               | TIT: 1.000 (85)     |
| YRI        | T: 1.000 (216)            |               | TIT: 1.000 (108)    |
| AMR        | T: 0.922 (640)            | C: 0.078 (54) | TIT: 0.856 (297)    |
| CLM        | T: 0.936 (176)            | C: 0.064 (12) | TIT: 0.883 (83)     |
| MXL        | T: 0.938 (120)            | C: 0.062 (8)  | TIT: 0.875 (56)     |
| PEL        | T: 0.871 (148)            | C: 0.129 (22) | TIT: 0.753 (64)     |
| PUR        | T: 0.942 (196)            | C: 0.058 (12) | TIT: 0.904 (94)     |
| EAS        | T: 1.000 (1008)           |               | TIT: 1.000 (504)    |
| CDX        | T: 1.000 (186)            |               | TIT: 1.000 (93)     |
| CHB        | T: 1.000 (206)            |               | TIT: 1.000 (103)    |
| CHS        | T: 1.000 (210)            |               | TIT: 1.000 (105)    |
| JPT        | T: 1.000 (208)            |               | TIT: 1.000 (104)    |
| KHV        | T: 1.000 (198)            |               | TIT: 1.000 (99)     |
| EUR        | T: 0.999 (1005)           | C: 0.001 (1)  | TIT: 0.998 (502)    |
| CEU        | T: 1.000 (198)            |               | TIT: 1.000 (99)     |
| FIN        | T: 1.000 (198)            |               | TIT: 1.000 (99)     |
| GBR        | T: 0.995 (181)            | C: 0.005 (1)  | TIT: 0.989 (90)     |
| IBS        | T: 1.000 (214)            |               | TIT: 1.000 (107)    |
| TSI        | T: 1.000 (214)            |               | TIT: 1.000 (107)    |

Now OCE-specific SNPs:

```
more OceaniaSpecificSNPsEstonia2_ALL
```

They are practically absent in 1000G by obvious reasons (no OCE among 1000G)

All in all, the results are good!

## November 12, 2021

AFR-specific

Finished.

November 13, 2021

Examination of the reverse situation: In EAS allele is absent, while in other region this allele is frequent (counting 0 instead of 1 in VCF). For this purpose I created two programs:

`PopulationSpecific1000gCHIreverse.pl` and `ChinaSNPstart2reverse.pl`. It works on 1000G dataset.

Below is the example of one of such SNPs. In total for EAS I got 102 of such SNPs, some of them are indels.

```
afedorov@bio:~/NOV2021$ wc PopulationSpecificSNPsCHI180reverse_ALL
102  816 4839 PopulationSpecificSNPsCHI180reverse_ALL
```

My interpretation is that one of the frequent alleles has been fixed in EAS, while its frequent counterpart allele is all over the World except EAS.

It takes about 30 min to run this program on Chr22. And 3-4 hours for the entire genome.

## rs9770059 SNP

Most severe consequence

Alleles

Change tolerance

Location

Evidence status ⓘ

HGVs names

Intron variant | [See all predicted consequences](#)

T/G | Ancestral: T | MAF: 0.40 (G) | Highest population MAF: 0.49

CADD: G:3.103 | GERP: -1.96

Chromosome 7:155307927 (forward strand) | VCF: 7 155307927 rs9770059 T G

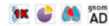

This variant has 5 HGVS names - [Hide](#)

- NC\_000007.14:g.155307927T>G
- ENST00000340368.9:c.805-314T>G
- ENST00000342407.5:c.\*18-314T>G
- ENST00000344756.8:c.420-314T>G
- ENST00000476756.1:c.601-314T>G

Synonyms

This variant has 4 synonyms - [Show](#)

Genotyping chips

This variant has assays on 4 chips - [Show](#)

Original source

Variants (including SNPs and indels) imported from dbSNP (release 154) | [View in dbSNP](#)

About this variant

This variant overlaps [4 transcripts](#) and has [2504 sample genotypes](#).

## Population genetics ⓘ

### 1000 Genomes Project Phase 3 allele frequencies

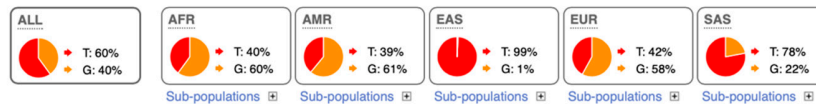

[Jump to: 1000 Genomes Project Phase 3 \(32\)](#) | [gnomAD genomes r3.0 \(10\)](#) | [NCBI ALFA \(12\)](#) | [GEM-J \(1\)](#) | [TOPMed \(1\)](#) | [UK10K \(2\)](#)

### 1000 Genomes Project Phase 3 (32) ⓘ

| Population | Allele: frequency (count)       | Genotype: frequency (count)                         |
|------------|---------------------------------|-----------------------------------------------------|
| ALL        | T: 0.596 (2987) G: 0.404 (2021) | TIT: 0.424 (1061) GIG: 0.231 (578) GIT: 0.345 (865) |
| AFR        | T: 0.399 (527) G: 0.601 (795)   | TIT: 0.179 (118) GIG: 0.381 (252) GIT: 0.440 (291)  |
| ACB        | T: 0.370 (71) G: 0.630 (121)    | TIT: 0.135 (13) GIG: 0.396 (38) GIT: 0.469 (45)     |
| ASW        | T: 0.393 (48) G: 0.607 (74)     | TIT: 0.180 (11) GIG: 0.393 (24) GIT: 0.426 (26)     |
| ESN        | T: 0.414 (82) G: 0.586 (116)    | TIT: 0.222 (22) GIG: 0.394 (39) GIT: 0.384 (38)     |
| GWD        | T: 0.429 (97) G: 0.571 (129)    | TIT: 0.204 (23) GIG: 0.345 (39) GIT: 0.451 (51)     |
| LWK        | T: 0.338 (67) G: 0.662 (131)    | TIT: 0.121 (12) GIG: 0.444 (44) GIT: 0.434 (43)     |
| MSL        | T: 0.388 (66) G: 0.612 (104)    | TIT: 0.153 (13) GIG: 0.376 (32) GIT: 0.471 (40)     |
| YRI        | T: 0.444 (96) G: 0.556 (120)    | TIT: 0.222 (24) GIG: 0.333 (36) GIT: 0.444 (48)     |
| AMR        | T: 0.390 (271) G: 0.610 (423)   | TIT: 0.159 (55) GIG: 0.378 (131) GIT: 0.464 (161)   |
| CLM        | T: 0.399 (75) G: 0.601 (113)    | TIT: 0.160 (15) GIG: 0.362 (34) GIT: 0.479 (45)     |
| MXL        | T: 0.469 (60) G: 0.531 (68)     | TIT: 0.250 (16) GIG: 0.312 (20) GIT: 0.438 (28)     |
| PEL        | T: 0.394 (67) G: 0.606 (103)    | TIT: 0.165 (14) GIG: 0.376 (32) GIT: 0.459 (39)     |
| PUR        | T: 0.332 (69) G: 0.668 (139)    | TIT: 0.096 (10) GIG: 0.433 (45) GIT: 0.471 (49)     |
| EAS        | T: 0.992 (1000) G: 0.008 (8)    | TIT: 0.984 (496) GIT: 0.016 (8)                     |
| CDX        | T: 0.995 (185) G: 0.005 (1)     | TIT: 0.989 (92) GIT: 0.011 (1)                      |
| CHB        | T: 0.985 (203) G: 0.015 (3)     | TIT: 0.971 (100) GIT: 0.029 (3)                     |
| CHS        | T: 0.990 (208) G: 0.010 (2)     | TIT: 0.981 (103) GIT: 0.019 (2)                     |
| JPT        | T: 1.000 (208) G: 0.000 (0)     | TIT: 1.000 (104)                                    |
| KHV        | T: 0.990 (196) G: 0.010 (2)     | TIT: 0.980 (97) GIT: 0.020 (2)                      |
| EUR        | T: 0.420 (423) G: 0.580 (583)   | TIT: 0.169 (85) GIG: 0.328 (165) GIT: 0.503 (253)   |
| CEU        | T: 0.369 (73) G: 0.631 (125)    | TIT: 0.111 (11) GIG: 0.374 (37) GIT: 0.515 (51)     |
| FIN        | T: 0.389 (77) G: 0.611 (121)    | TIT: 0.172 (17) GIG: 0.394 (39) GIT: 0.434 (43)     |
| GBR        | T: 0.396 (72) G: 0.604 (110)    | TIT: 0.176 (16) GIG: 0.385 (35) GIT: 0.440 (40)     |
| IBS        | T: 0.430 (92) G: 0.570 (122)    | TIT: 0.150 (16) GIG: 0.290 (31) GIT: 0.561 (60)     |
| TSI        | T: 0.509 (109) G: 0.491 (105)   | TIT: 0.234 (25) GIG: 0.215 (23) GIT: 0.551 (59)     |
| SAS        | T: 0.783 (766) G: 0.217 (212)   | TIT: 0.628 (307) GIG: 0.061 (30) GIT: 0.311 (152)   |
| BEB        | T: 0.797 (137) G: 0.203 (35)    | TIT: 0.663 (57) GIG: 0.070 (6) GIT: 0.267 (23)      |
| GIH        | T: 0.782 (161) G: 0.218 (45)    | TIT: 0.612 (63) GIG: 0.049 (5) GIT: 0.340 (35)      |
| ITU        | T: 0.794 (162) G: 0.206 (42)    | TIT: 0.637 (65) GIG: 0.049 (5) GIT: 0.314 (35)      |
| PJL        | T: 0.708 (136) G: 0.292 (56)    | TIT: 0.562 (54) GIG: 0.146 (14) GIT: 0.292 (28)     |

These 102 SNPs are enriched with triplets and indels:

```
afedorov@bio:~/NOV2021$ more PopulationSpecificSNPsCHI180reverse_ALL
rs550508207;rs61288664 189 154 6 1360 212 10250248 1915
rs537584292;rs10548470 378 209 4 1082 139 31623062 1808
rs587637054;rs113676423 380 848 4 932 467 163662893 2627
rs7552755 258 530 8 1045 144 236062563 1977
```

|                                                 |     |      |   |      |     |           |      |  |  |  |  |  |  |  |  |  |  |  |  |
|-------------------------------------------------|-----|------|---|------|-----|-----------|------|--|--|--|--|--|--|--|--|--|--|--|--|
| rs10189730                                      | 411 | 414  | 8 | 858  | 315 | 5233900   | 1998 |  |  |  |  |  |  |  |  |  |  |  |  |
| rs11690918                                      | 284 | 348  | 6 | 926  | 464 | 43474112  | 2022 |  |  |  |  |  |  |  |  |  |  |  |  |
| rs7593400                                       | 187 | 422  | 8 | 1174 | 252 | 71533192  | 2035 |  |  |  |  |  |  |  |  |  |  |  |  |
| rs552762013;rs139573656                         | 270 | 524  | 4 | 1177 | 294 | 103783737 | 2265 |  |  |  |  |  |  |  |  |  |  |  |  |
| rs10200938                                      | 345 | 910  | 3 | 413  | 452 | 177645345 | 2120 |  |  |  |  |  |  |  |  |  |  |  |  |
| rs552019620                                     | 140 | 352  | 3 | 1248 | 190 | 213574967 | 1930 |  |  |  |  |  |  |  |  |  |  |  |  |
| rs7570666                                       | 361 | 932  | 8 | 379  | 454 | 216634123 | 2126 |  |  |  |  |  |  |  |  |  |  |  |  |
| rs7578746                                       | 340 | 956  | 6 | 680  | 390 | 228546406 | 2366 |  |  |  |  |  |  |  |  |  |  |  |  |
| rs567101642;rs570614020;rs563012911;rs555478859 | 434 | 873  | 9 | 929  | 516 | 6147144   | 2752 |  |  |  |  |  |  |  |  |  |  |  |  |
| rs369258977                                     | 311 | 701  | 8 | 842  | 292 | 34214157  | 2146 |  |  |  |  |  |  |  |  |  |  |  |  |
| rs77058777                                      | 244 | 674  | 2 | 918  | 120 | 44586890  | 1956 |  |  |  |  |  |  |  |  |  |  |  |  |
| rs12715530                                      | 285 | 536  | 3 | 696  | 309 | 58354251  | 1826 |  |  |  |  |  |  |  |  |  |  |  |  |
| rs183926141;rs540644886                         | 396 | 765  | 2 | 449  | 336 | 58409536  | 1946 |  |  |  |  |  |  |  |  |  |  |  |  |
| rs550762285;rs551139233                         | 461 | 442  | 4 | 665  | 316 | 59135511  | 1884 |  |  |  |  |  |  |  |  |  |  |  |  |
| rs561991767;rs6784685                           | 546 | 604  | 0 | 1188 | 271 | 59172575  | 2609 |  |  |  |  |  |  |  |  |  |  |  |  |
| rs550503162;rs11426073                          | 182 | 284  | 2 | 1194 | 324 | 116952698 | 1984 |  |  |  |  |  |  |  |  |  |  |  |  |
| rs560428318;rs10575001                          | 261 | 640  | 4 | 755  | 320 | 141097203 | 1976 |  |  |  |  |  |  |  |  |  |  |  |  |
| rs537443279;rs142683341                         | 286 | 405  | 6 | 944  | 229 | 194020689 | 1864 |  |  |  |  |  |  |  |  |  |  |  |  |
| rs765831                                        | 269 | 446  | 8 | 829  | 292 | 6033657   | 1836 |  |  |  |  |  |  |  |  |  |  |  |  |
| rs355689                                        | 227 | 532  | 4 | 1119 | 206 | 78507797  | 2084 |  |  |  |  |  |  |  |  |  |  |  |  |
| rs9993932                                       | 300 | 623  | 8 | 821  | 362 | 92682249  | 2106 |  |  |  |  |  |  |  |  |  |  |  |  |
| rs189406292;rs56866437                          | 310 | 464  | 3 | 998  | 186 | 121276184 | 1958 |  |  |  |  |  |  |  |  |  |  |  |  |
| rs35384592                                      | 323 | 812  | 4 | 289  | 424 | 190019703 | 1848 |  |  |  |  |  |  |  |  |  |  |  |  |
| rs2035612                                       | 328 | 630  | 4 | 454  | 430 | 1993600   | 1842 |  |  |  |  |  |  |  |  |  |  |  |  |
| rs7356708                                       | 130 | 90   | 0 | 1467 | 120 | 130593723 | 1807 |  |  |  |  |  |  |  |  |  |  |  |  |
| rs7739347                                       | 383 | 705  | 8 | 391  | 357 | 7026977   | 1836 |  |  |  |  |  |  |  |  |  |  |  |  |
| rs9505001                                       | 409 | 705  | 9 | 479  | 362 | 7027384   | 1955 |  |  |  |  |  |  |  |  |  |  |  |  |
| rs6904651                                       | 408 | 705  | 9 | 348  | 354 | 7032763   | 1815 |  |  |  |  |  |  |  |  |  |  |  |  |
| rs545837318;rs139148321                         | 683 | 1314 | 6 | 204  | 514 | 7060560   | 2715 |  |  |  |  |  |  |  |  |  |  |  |  |
| rs531005467;rs149418128                         | 237 | 267  | 8 | 1290 | 166 | 50459249  | 1960 |  |  |  |  |  |  |  |  |  |  |  |  |
| rs545402591;rs2260243                           | 275 | 540  | 6 | 975  | 364 | 163860387 | 2154 |  |  |  |  |  |  |  |  |  |  |  |  |
| rs149006477                                     | 506 | 612  | 8 | 1142 | 409 | 7902650   | 2669 |  |  |  |  |  |  |  |  |  |  |  |  |
| rs10231872                                      | 185 | 381  | 2 | 901  | 524 | 16598126  | 1991 |  |  |  |  |  |  |  |  |  |  |  |  |
| rs56335835                                      | 219 | 394  | 9 | 994  | 375 | 20606519  | 1982 |  |  |  |  |  |  |  |  |  |  |  |  |
| rs1525030                                       | 398 | 770  | 4 | 1320 | 482 | 108859727 | 2970 |  |  |  |  |  |  |  |  |  |  |  |  |
| rs9770059                                       | 423 | 583  | 8 | 600  | 212 | 155099637 | 1818 |  |  |  |  |  |  |  |  |  |  |  |  |
| rs9770060                                       | 423 | 583  | 8 | 605  | 212 | 155099650 | 1823 |  |  |  |  |  |  |  |  |  |  |  |  |
| rs9770068                                       | 420 | 583  | 8 | 592  | 212 | 155099762 | 1807 |  |  |  |  |  |  |  |  |  |  |  |  |
| rs7012429                                       | 206 | 302  | 0 | 1228 | 79  | 2967970   | 1815 |  |  |  |  |  |  |  |  |  |  |  |  |
| rs149646093                                     | 339 | 826  | 6 | 543  | 387 | 8925433   | 2095 |  |  |  |  |  |  |  |  |  |  |  |  |
| rs6601427                                       | 270 | 581  | 6 | 651  | 384 | 10156025  | 1886 |  |  |  |  |  |  |  |  |  |  |  |  |
| rs533365216;rs72283782                          | 403 | 1012 | 1 | 410  | 480 | 66398717  | 2305 |  |  |  |  |  |  |  |  |  |  |  |  |
| rs4433240                                       | 484 | 1450 | 0 | 16   | 348 | 16801130  | 2298 |  |  |  |  |  |  |  |  |  |  |  |  |
| rs373029613;rs7043103                           | 373 | 283  | 6 | 1097 | 155 | 91664206  | 1908 |  |  |  |  |  |  |  |  |  |  |  |  |
| rs551863172                                     | 344 | 480  | 4 | 895  | 234 | 109733656 | 1953 |  |  |  |  |  |  |  |  |  |  |  |  |
| rs370175927                                     | 445 | 640  | 9 | 606  | 157 | 873215    | 1848 |  |  |  |  |  |  |  |  |  |  |  |  |
| rs12261591                                      | 199 | 304  | 3 | 1516 | 103 | 17077390  | 2122 |  |  |  |  |  |  |  |  |  |  |  |  |
| rs137905132                                     | 121 | 281  | 3 | 1153 | 407 | 31739802  | 1962 |  |  |  |  |  |  |  |  |  |  |  |  |
| rs112291200;rs7904458                           | 251 | 569  | 6 | 936  | 284 | 45342273  | 2040 |  |  |  |  |  |  |  |  |  |  |  |  |
| rs4622198                                       | 216 | 564  | 4 | 925  | 172 | 78923581  | 1877 |  |  |  |  |  |  |  |  |  |  |  |  |
| rs7904234                                       | 311 | 276  | 0 | 1227 | 204 | 109724292 | 2018 |  |  |  |  |  |  |  |  |  |  |  |  |
| rs644635                                        | 267 | 573  | 2 | 787  | 258 | 100756968 | 1885 |  |  |  |  |  |  |  |  |  |  |  |  |
| rs601496                                        | 260 | 570  | 3 | 732  | 256 | 100762986 | 1818 |  |  |  |  |  |  |  |  |  |  |  |  |
| rs576278                                        | 259 | 569  | 2 | 740  | 250 | 100768790 | 1818 |  |  |  |  |  |  |  |  |  |  |  |  |
| rs662870                                        | 265 | 571  | 2 | 773  | 254 | 100775268 | 1863 |  |  |  |  |  |  |  |  |  |  |  |  |

I found a bug in Step2.pl programs. It counts 1|1 as a single allele and should be as two alleles.

I updated V2 of the program:

```
2174 cp China1000gStep2.pl China1000gStep2_v2.pl
2175 vi China1000gStep2_v2.pl
2176 ls -l *pl
2177 vi ChinaSNPstart2.pl
2178 perl ChinaSNPstart2.pl (at 21:02 ->)
```

```
for $y (9..$#e) {
    $p1=0;
```

```

        if ($e[$y] =~ /^(\\d)\\|(\\d)/) {
            if ($1>1.5) {$1 =0;}
            if ($2>1.5) {$2 =0;}
            $p1 = $1 + $2;
        }
        if ($p1 >0 ) {
            #
            print "$column_pop{$y}\\t";
            $line .= $column_pop{$y} . "\\t";
            if ($column_pop{$y} =~ /CHB|CHS|CDX|JPT|KHV/)
                if ($column_pop{$y} =~ /GBR|FIN|CEU|IBS|TSI/)
                    if ($column_pop{$y} =~ /YRI|LWK|GWD|MSL|ESN|ACB/)
                        if ($column_pop{$y} =~ /GIH|PJL|BEB|STU|ITU/)
                            if ($column_pop{$y} =~ /MXL|PUR|CLM|PEL/)
                                #
                                print
                                "$column_pop{$y}_$column_cont{$y}_$column_id{$y}\\t";
                            }
            }
        }
    }
}

{$asia+=$p1;}
{$eur+=$p1;}
{$afr+=$p1;}
{$ind+=$p1;}
{$amr+=$p1;}

```

## November 24, 2021

Fixing the previous problem with Step2 programs for AFR, AMR, OCE.

### HISTORY:

```

cd NOV2021/
3331 ls
3332 ls -l *pl
3333 vi China1000gStep2_v2.pl
3334 head -75 China1000gStep2_v2.pl |tail -20
3335 ls -l *pl |grep Step2
3336 cp Africa1000gStep2.pl Africa1000gStep2_v2.pl
3337 vi Africa1000gStep2_v2.pl
3338 cp AmericanSNPs1000G.pl American1000gStep2_v2.pl
3339 vi America1000gStep2_v2.pl
3340 vi Oceania1000gStep2new.pl
3341 vi Oceania1000gStep2new.pl
3342 cp Oceania1000gStep2new.pl Oceania1000gStep2new_v2.pl
3343 ls -l *pl |grep Step2
3344 rm Oceania1000gStep2new.pl
3345 ls -l *pl |grep Step2
3346 ls -l *pl
3347 vi ChinaSNPstart2.pl
3348 vi AfricaSNPstart2.pl
3349 vi AmericanSNPstart2.pl
3350 vi OceaniaSNPstart2.pl
3351 perl AfricaSNPstart2.pl

```

I started AfricaSNPstart2.pl at 19:10 19:58 (has been finished)

AfricaSNPstart3.pl took about 20 min.

I finished recalculation of AFR, AMR, CHI, OCE. Below is history:

```

3351 perl AfricaSNPstart2.pl
3352 history
3353 top
3354 ls
3355 ls -l *pl
3356 perl AfricanSNPstart3.pl
3357 top
3358 ls
3359 ls -l *pl

```

```

3360 perl AmericanSNPstart2.pl
3361 top
3362 ls
3363 ls -l *pl
3364 perl AmericanSNPstart3.pl
3365 top
3366 ls
3367 ls -l *pl
3368 vi OceaniaSNPstart2.pl
3369 perl OceaniaSNPstart2.pl
3370 top
3371 perl OceaniaSNPstart3.pl
3372 top
3373 ls -l *pl
3374 vi ChinaSNPstart2
3375 vi ChinaSNPstart2.pl
3376 vi ChinaSNPstart2reverse.pl
3377 perl ChinaSNPstart2.pl
3378 top
3379 ls -l *pl
3380 perl ChinaSNPstart3.pl

```

**March 15, 2022**

#### **SUMMARY ON OCE-specific SNP dataset**

- 1) Start from Simons' dataset. The program counts number of Alt-allele SNPs in OCE: /Aus|Bou|Pap/, which should be 7 or more alleles (among 19 people) The program also counts this allele in OCE-flanking populations: /Dus|Mao|Igo|Hav/. In the rest of Simons' populations this allele must be absent. It creates the phase-1 OCE-specific SNPs (OCE\_SNPs\_\$\_chr), where \$\_chr means the number of chromosome (from 1 to 22)
- 2) Comparison with 1000G dataset. The second program compares phase-1 OCE-specific SNPs with all 2504 individuals from 1000G. The number of "OCE-specific phase-1" alleles in all 1000G should be less or equal to the number of these alleles among 19 OCE people. Thus, the frequency of OCE-specific SNPs at this second step must be >100 times frequent than in the rest of the world. This computation creates phase-2 OCE-specific SNPs, which are stored in the OceaniaSpecificSNPs\_\$\_chr files.
- 3) Final comparison with Estonian dataset using OceanEstoniaStep3.pl program. The number of OCE-specific alleles among all Estonian DB people must be 4 or less. This is the final phase-3 purification. The main results are in the files: OceaniaSpecificSNPsEstonia2\_\$\_chr. This file contains the number of OCE-specific alleles in all datasets (Simons, 1000G, and Estonian) and also the name of populations, where they are present.

|             |     |         |         |         |         |         |             |   |   |   |   |   |
|-------------|-----|---------|---------|---------|---------|---------|-------------|---|---|---|---|---|
| rs190585583 | 8   | 0       | 0       | 0       | CHR1    | 769040  | rs190585583 | A | T | 0 | 0 | 0 |
| 0           | NOT |         |         |         |         |         |             |   |   |   |   |   |
| rs373000721 | 9   | 0       | 0       | 0       | CHR1    | 833529  | rs373000721 | G | A | 0 | 0 | 0 |
| 0           | NOT | Koi_OCE | Kos_OCE | Koi_OCE |         |         |             |   |   |   |   |   |
| rs367861531 | 10  | 0       | 0       | 0       | CHR1    | 835831  | rs367861531 | G | A | 0 | 0 | 0 |
| 1           | YRI |         | Koi_OCE | Kos_OCE | Koi_OCE |         |             |   |   |   |   |   |
| rs369581566 | 10  | 0       | 0       | 0       | CHR1    | 837238  | rs369581566 | G | A | 0 | 0 | 0 |
| 0           | NOT | Koi_OCE | Kos_OCE | Koi_OCE |         |         |             |   |   |   |   |   |
| rs377052638 | 8   | 0       | 0       | 0       | CHR1    | 837992  | rs377052638 | C | G | 0 | 0 | 0 |
| 0           | NOT | Koi_OCE | Kos_OCE | Koi_OCE |         |         |             |   |   |   |   |   |
| rs373451994 | 10  | 0       | 0       | 0       | CHR1    | 839636  | rs373451994 | G | A | 0 | 0 | 0 |
| 0           | NOT | Koi_OCE | Kos_OCE | Koi_OCE |         |         |             |   |   |   |   |   |
| rs146441147 | 9   | 0       | 0       | 0       | CHR1    | 979559  | rs146441147 | C | T | 0 | 0 | 0 |
| 0           | NOT | Kos_OCE | Koi_OCE |         |         |         |             |   |   |   |   |   |
| rs372205897 | 12  | 0       | 0       | 0       | CHR1    | 1029701 | rs372205897 | C | T | 0 | 0 | 0 |
| 0           | NOT | Kos_OCE | Koi_OCE |         |         |         |             |   |   |   |   |   |
| rs373322116 | 12  | 0       | 0       | 0       | CHR1    | 1047802 | rs373322116 | G | A | 0 | 0 | 0 |
| 0           | NOT | Kos_OCE | Koi_OCE |         |         |         |             |   |   |   |   |   |

**March 25, 2022**

New thresholds for Region-Specific SNPs.

EUR- specific:

1) >18% for Simon project

| Region/Populations | #SNPs Region-specific<br>Step-1; Simons' DB | #SNPs Region-specific<br>V2: Step-2; 1000 Genomes | #SNPs Region-specific<br>V3: Step-2; 1000 Genomes |
|--------------------|---------------------------------------------|---------------------------------------------------|---------------------------------------------------|
| Africa             | 204,983                                     | 157,492                                           | 112,658                                           |
| Europe             | 6,585                                       | 3,952                                             | 1,539                                             |
| East Asia          | 7,789                                       | 2,893                                             | 441                                               |
| Native America     | 46,994                                      | 20,754                                            | 4,133                                             |
| Oceania            | 77,437                                      | 73,434                                            | 71,848                                            |
|                    |                                             |                                                   |                                                   |

**SEE ANOTHER DOCUMENT: OCEspecificSNPtable.docx**

**March 28, 2022**

Protocols from History:

```

2629 cp ChinaSNPsESTONIA_v3.pl EuropeSNPsESTONIA_v3.pl
2630 vi EuropeSNPsESTONIA_v3.pl
2631 vi EuropeSNPstart3.pl
2632 perl EuropeSNPstart3.pl
2633 top
2634 ls
2635 more AmericaSpecificEstoniaV3_2_1
2636 less -S AmericaSpecificEstoniaV3_2_1
2637 ls
2638 top
2639 ls
2640 wc EuropeSpecificEstoniaV3_2_1
2641 wc EuropeSpecificEstoniaV3_2_2
2642 wc EuropeSpecificEstoniaV3_2_3
2643 wc EuropeSpecificEstoniaV3_2_4
2644 wc EuropeSpecificEstoniaV3_2_5
2645 wc EuropeSpecificEstoniaV3_2_6

```

```

2646 wc EuropeSpecificEstoniaV3_2_7
2647 wc EuropeSpecificEstoniaV3_2_8
2648 wc EuropeSpecificEstoniaV3_2_9
2649 wc EuropeSpecificEstoniaV3_2_10
2650 wc EuropeSpecificEstoniaV3_2_11
2651 wc EuropeSpecificEstoniaV3_2_12
2652 wc EuropeSpecificEstoniaV3_2_13
2653 wc EuropeSpecificEstoniaV3_2_14
2654 wc EuropeSpecificEstoniaV3_2_15
2655 wc EuropeSpecificEstoniaV3_2_16
2656 wc EuropeSpecificEstoniaV3_2_17
2657 wc EuropeSpecificEstoniaV3_2_18
2658 wc EuropeSpecificEstoniaV3_2_19
2659 wc EuropeSpecificEstoniaV3_2_20
2660 wc EuropeSpecificEstoniaV3_2_21
2661 wc EuropeSpecificEstoniaV3_2_22
2662 history
2663 vi EuropeSNPsESTONIA_v3.pl
2664 ls
2665 wc EuropeSpecificEstoniaV3_2_22
2666 wc EuropeSpecificV3_1
2667 wc EuropeSpecificEstoniaV3_2_1
2668 wc EuropeSpecificEstoniaV3_2_2
2669 wc EuropeSpecificV3_2
2670 wc EuropeSpecificV3_1
2671 wc EuropeSpecificV3_2
2672 wc EuropeSpecificV3_3
2673 wc EuropeSpecificV3_4
2674 wc EuropeSpecificV3_5
2675 wc EuropeSpecificV3_6
2676 wc EuropeSpecificV3_7
2677 wc EuropeSpecificV3_8
2678 wc EuropeSpecificV3_9
2679 wc EuropeSpecificV3_10
2680 wc EuropeSpecificV3_11
2681 wc EuropeSpecificV3_12
2682 wc EuropeSpecificV3_13
2683 wc EuropeSpecificV3_14
2684 wc EuropeSpecificV3_15
2685 wc EuropeSpecificV3_16
2686 wc EuropeSpecificV3_17
2687 wc EuropeSpecificV3_18
2688 wc EuropeSpecificV3_19
2689 wc EuropeSpecificV3_20
2690 wc EuropeSpecificV3_21
2691 wc EuropeSpecificV3_22
2692 ls -l *pl
2693 cp EuropeSNPsESTONIA_v3.pl AfricaSNPsESTONIA_v3.pl
2694 vi AfricaSNPsESTONIA_v3.pl
2695 history
2696 grep EUR estonian_pops2_A2.txt |wc
2697 grep AFR estonian_pops2_A2.txt |wc
2698 grep AFR estonian_pops2_A2.txt
2699 vi AfricaSNPsESTONIA_v3.pl
2700 ls -l *pl
2701 vi AfricanSNPstart3.pl
2702 perl AfricanSNPstart3.pl
2703 top
2704 ls
2705 wc AfricaSpecificEstoniaV3_2_1
2706 wc AfricaSpecificEstoniaV3_2_2
2707 wc AfricaSpecificEstoniaV3_2_3
2708 wc AfricaSpecificEstoniaV3_2_4
2709 wc AfricaSpecificEstoniaV3_2_5
2710 wc AfricaSpecificEstoniaV3_2_6
2711 wc AfricaSpecificEstoniaV3_2_7
2712 wc AfricaSpecificEstoniaV3_2_8
2713 wc AfricaSpecificEstoniaV3_2_9
2714 wc AfricaSpecificEstoniaV3_2_10
2715 wc AfricaSpecificEstoniaV3_2_11
2716 wc AfricaSpecificEstoniaV3_2_12

```

```

2717 wc AfricaSpecificEstoniaV3_2_13
2718 wc AfricaSpecificEstoniaV3_2_14
2719 wc AfricaSpecificEstoniaV3_2_15
2720 wc AfricaSpecificEstoniaV3_2_16
2721 wc AfricaSpecificEstoniaV3_2_17
2722 wc AfricaSpecificEstoniaV3_2_18
2723 wc AfricaSpecificEstoniaV3_2_19
2724 wc AfricaSpecificEstoniaV3_2_20
2725 wc AfricaSpecificEstoniaV3_2_21
2726 wc AfricaSpecificEstoniaV3_2_22
2727 ls
2728 ls -l *pl
2729 cp OceaniaSNPstart3.pl ClusteringSNPs.pl
2730 vi ClusteringSNPs.pl
2731 less -S OceaniaSpecificV3_1
2732 less -S OceaniaSpecificV3_2_1
2733 less -S OceaniaSpecificEstoniaV3_2_19
2734 vi ChinaSNPsESTONIA_v3.pl
2735 vi ClusteringSNPs.pl
2736 perl ClusteringSNPs.pl OceaniaSpecificEstoniaV3_2_
2737 vi ClusteringSNPs.pl
2738 perl ClusteringSNPs.pl OceaniaSpecificEstoniaV3_2_
2739 vi ClusteringSNPs.pl
2740 perl ClusteringSNPs.pl OceaniaSpecificEstoniaV3_2_
2741 vi ClusteringSNPs.pl
2742 perl ClusteringSNPs.pl OceaniaSpecificEstoniaV3_2_
2743 vi ClusteringSNPs.pl
2744 perl ClusteringSNPs.pl OceaniaSpecificEstoniaV3_2_
2745 ls
2746 perl ClusteringSNPs.pl AmericaSpecificEstoniaV3_2_
2747 perl ClusteringSNPs.pl ChinaSpecificEstoniaV3_2_
2748 perl ClusteringSNPs.pl EuropeSpecificEstoniaV3_2_
2749 perl ClusteringSNPs.pl AfricaSpecificEstoniaV3_2_
2750 ls -l *pl
2751 vi OceaniaSNPsESTONIA_v3.pl
2752 ls
2753 less -S OceaniaSpecificEstoniaV3_2_2
2754 less -S OceaniaSpecificEstoniaV3_2_
2755 less -S OceaniaSpecificEstoniaV3_2_2
2756 less -S OceaniaSpecificEstoniaV3_2_
2757 less -S AfricaSpecificEstoniaV3_2_
2758 ls -l *pl
2759 vi Africa1000gStep2_v3.pl
2760 less -S AfricaSpecificEstoniaV3_2_
2761 history

```

## April 9, 2022

### History:

```

2017 ls -l FinalOce*
2018 less -S FinalOceania__ALL
2019 mv FinalOceania__ALL FinalOceania_ALL
2020 perl ConcatenateFiles.pl FinalAfrica_
2021 perl ConcatenateFiles.pl FinalEurope_
2022 perl ConcatenateFiles.pl FinalEastAsia_
2023 perl ConcatenateFiles.pl FinalAmerica_
2024 ls -l *ALL
2025 mv FinalAfrica__ALL FinalAfrica_ALL
2026 mv FinalAmerica__ALL FinalAmerica_ALL
2027 mv FinalEastAsia__ALL FinalEastAsia_ALL
2028 mv FinalEurope__ALL FinalEurope_ALL
2029 ls -l *ALL
2030 ls -l *pl
2031 vi AfricanSNPstart3.pl
2032 ls
2033 ls -l *pl
2034 vi PopulationSpecific1000gCHIreverse.pl
2035 vi ChinaSNPstart2reverse.pl

```

```

2036 ls -l Pop*
2037 more PopulationSpecificSNPsCH1180reverse_ALL
2038 ls -l Pop*
2039 vi PopulationSpecific1000gCHIreverse.pl
2040 cp PopulationSpecific1000gCHIreverse.pl PopulationSpecific1000gAFRreverse.pl
2041 vi PopulationSpecific1000gAFRreverse.pl
2042 perl PopulationSpecific1000gAFRreverse.pl 22
2043 ls -l Pop*
2044 more PopulationSpecificSNPsAFR1800reverse_22
2045 vi PopulationSpecific1000gAFRreverse.pl
2046 nohup perl PopulationSpecific1000gAFRreverse.pl 22 &
2047 cp PopulationSpecific1000gAFRreverse.pl PopulationSpecific1000gEURreverse.pl
2048 vi PopulationSpecific1000gEURreverse.pl
2049 nohup perl PopulationSpecific1000gEURreverse.pl 22 &
2050 nohup perl PopulationSpecific1000gEURreverse.pl 22 &
2051 top
2052 ls -l Pop*
2053 more PopulationSpecificSNPsAFR1800reverse_22
2054 vi PopulationSpecific1000gAFRreverse.pl
2055 history 50
2056 vi ChinaSNPstart2reverse.pl
2057 cp ChinaSNPstart2reverse.pl AfricaSNPstart2reverse.pl
2058 vi AfricaSNPstart2reverse.pl
2059 rm PopulationSpecificSNPsAFR1800reverse_22
2060 perl AfricaSNPstart2reverse.pl
2061 vi EuropeSNPstart2reverse.pl
2062 vi PopulationSpecific1000gEURreverse.pl
2063 perl EuropeSNPstart2reverse.pl
2064 ls -l Pop*
2065 more PopulationSpecificSNPsAFR1500reverse_22
2066 ls -l Pop*
2067 more PopulationSpecificSNPsEUR1000reverse_15
2068 more PopulationSpecificSNPsAFR1500reverse_16
2069 ls -l Pop*
2070 more PopulationSpecificSNPsEUR1000reverse_16
2071 more PopulationSpecificSNPsEUR1000reverse_17
2072 more PopulationSpecificSNPsEUR1000reverse_21
2073 more PopulationSpecificSNPsEUR1000reverse_11
2074 more PopulationSpecificSNPsAFR1500reverse_12
2075 more PopulationSpecificSNPsAFR1500reverse_11
2076 more PopulationSpecificSNPsAFR1500reverse_10
2077 more PopulationSpecificSNPsAFR1500reverse_14
2078 ls -l Pop*
2079 more PopulationSpecificSNPsCH1180reverse_3
2080 more PopulationSpecificSNPsCH1180reverse_10
2081 more PopulationSpecificSNPsCH1180reverse_1
2082 top
2083 ls -l Pop*
2084 more PopulationSpecificSNPsEUR1000reverse_9
2085 more PopulationSpecificSNPsAFR1500reverse_1
2086 vi PopulationSpecific1000gEURreverse.pl
2087 history 70
2088 vi PopulationSpecific1000gAFRreverse.pl
2089 vi PopulationSpecific1000gCHIreverse.pl
2090 ls -l Pop*.pl
2091 ls -l *reverse.pl
2092 ls -l Pop*
2093 ls -l *reverse.pl
2094 nohup AfricaSNPstart2reverse.pl &
2095 nohup perl AfricaSNPstart2reverse.pl &
2096 nohup perl EuropeSNPstart2reverse.pl &
2097 vi EuropeSNPstart2reverse.pl
2098 top
2099 ls -l *reverse.pl
2100 ls -l Pop*
2101 vi PopulationSpecific1000gCHIreverse.pl
2102 ls -l *reverse.pl
2103 perl ChinaSNPstart2reverse.pl
2104 top
2105 history

```

April 10, 2022

## Continent-specific Allele Fixation

EXAMPLE:

### rs6671166 SNP

|                         |                                                                                                                                                                                                                                                                             |
|-------------------------|-----------------------------------------------------------------------------------------------------------------------------------------------------------------------------------------------------------------------------------------------------------------------------|
| Most severe consequence | <a href="#">intron variant</a>   <a href="#">See all predicted consequences</a>                                                                                                                                                                                             |
| Alleles                 | <b>G/A</b>   Ancestral: <b>G</b>   MAF: <b>0.30</b> (A)   Highest population MAF: <b>0.50</b>                                                                                                                                                                               |
| Change tolerance        | CADD: A:1.875   GERP: -0.34                                                                                                                                                                                                                                                 |
| Location                | <a href="#">Chromosome 1:154121349</a> (forward strand)   VCF: 1 154121349 rs6671166 G A                                                                                                                                                                                    |
| Evidence status         |  <b>AD</b>                                                                                                                                                                                 |
| HGVS names              | This variant has 3 HGVS names - <a href="#">Hide</a> <ul style="list-style-type: none"><li><a href="#">NC_000001.11:g.154121349G&gt;A</a></li><li><a href="#">ENST00000271854.3:c.1327-2541C&gt;T</a></li><li><a href="#">ENST00000368559.7:c.1327-2541C&gt;T</a></li></ul> |
| Synonyms                | This variant has 2 synonyms - <a href="#">Show</a>                                                                                                                                                                                                                          |
| Genotyping chips        | This variant has assays on 6 chips - <a href="#">Show</a>                                                                                                                                                                                                                   |
| Original source         | Variants (including SNPs and indels) imported from dbSNP (release 154)   <a href="#">View in dbSNP</a>                                                                                                                                                                      |
| About this variant      | This variant overlaps <a href="#">2 transcripts</a> , has <a href="#">3009 sample genotypes</a> , is associated with <a href="#">3 phenotypes</a> and is                                                                                                                    |

### Population genetics

#### 1000 Genomes Project Phase 3 allele frequencies

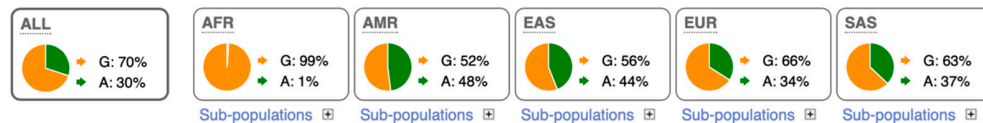

Jump to: [1000 Genomes Project Phase 3 \(32\)](#) | [gnomAD genomes r3.0 \(10\)](#) | [NCBI ALFA \(12\)](#) | [GEM-J \(1\)](#) | [TOPMed \(1\)](#) | [UK10K \(2\)](#) | [Gam](#)

#### 1000 Genomes Project Phase 3 (32)

| Population | Allele: frequency (count)       | Genotype: frequency |
|------------|---------------------------------|---------------------|
| ALL        | G: 0.702 (3517) A: 0.298 (1491) | G/G: 0.524 (1313)   |
| AFR        | G: 0.990 (1309) A: 0.010 (13)   | G/G: 0.980 (648)    |
| ACB        | G: 0.969 (186) A: 0.031 (6)     | G/G: 0.938 (90)     |
| ASW        | G: 0.943 (115) A: 0.057 (7)     | G/G: 0.885 (54)     |
| ESN        | G: 1.000 (198)                  | G/G: 1.000 (99)     |
| GWD        | G: 1.000 (226)                  | G/G: 1.000 (113)    |
| LWK        | G: 1.000 (198)                  | G/G: 1.000 (99)     |
| MSL        | G: 1.000 (170)                  | G/G: 1.000 (85)     |
| YRI        | G: 1.000 (216)                  | G/G: 1.000 (108)    |
| AMR        | G: 0.516 (358) A: 0.484 (336)   | G/G: 0.288 (100)    |

The data are in the files on BIO server:

```
-rw-rw-r-- 1 afedorov afedorov 316807 anp 10 18:23 PopulationSpecificSNPsAFR1000reverse_ALL
-rw-rw-r-- 1 afedorov afedorov 515400 anp 10 18:23 PopulationSpecificSNPsCHI1000reverse_ALL
-rw-rw-r-- 1 afedorov afedorov 2598 anp 10 18:21 PopulationSpecificSNPsEUR1000reverse_ALL
```

Also they are transformed into Excel tables:

```
-rw-r--r--@ 1 afedorov staff 430286 Apr 10 14:04 FixedAllelesAFR.xlsx
-rw-r--r--@ 1 afedorov staff 674057 Apr 10 14:06 FixedAllelesEAS.xlsx
-rw-r--r--@ 1 afedorov staff 13867 Apr 10 14:09 FixedAllelesEUR.xlsx
Alexeis-iMac:ATLAS3sept2020 afedorov$
```

**For example FixedAllelesEUR.xlsx:**

In the last 6 columns is number of allele counts in 5 continents. Counts of EUR in this table is <10.

| chromosome | Position  | RS-ids                                          | #alleles<br>AFR | #alleles<br>AMR | #alleles<br>EAS | #alleles<br>EUR | #alleles<br>SAS | #alleles<br>TOTAL |
|------------|-----------|-------------------------------------------------|-----------------|-----------------|-----------------|-----------------|-----------------|-------------------|
| 1          | 31620274  | rs533645834                                     | 969             | 50              | 126             | 5               | 59              | 1083              |
| 1          | 45778640  | rs112417297                                     | 950             | 54              | 183             | 9               | 18              | 1031              |
| 2          | 39875246  | rs72934232                                      | 967             | 60              | 72              | 2               | 66              | 1095              |
| 2          | 40533600  | rs61681991                                      | 937             | 72              | 74              | 8               | 18              | 1035              |
| 2          | 200389045 | rs544995569;rs111806968                         | 1096            | 63              | 18              | 6               | 28              | 1193              |
| 3          | 75226426  | rs538744842;rs113505457                         | 723             | 180             | 153             | 3               | 126             | 1032              |
| 3          | 156039668 | rs6773597                                       | 870             | 44              | 54              | 6               | 186             | 1106              |
| 3          | 188113131 | rs869631                                        | 882             | 54              | 14              | 4               | 286             | 1226              |
| 4          | 9413414   | rs10009417                                      | 904             | 57              | 140             | 2               | 162             | 1125              |
| 4          | 34522861  | rs543621960;rs112657587                         | 1047            | 74              | 22              | 5               | 48              | 1174              |
| 4          | 190831703 | rs2338002                                       | 1030            | 74              | 230             | 2               | 18              | 1124              |
| 5          | 174485090 | rs1875965                                       | 992             | 80              | 82              | 8               | 16              | 1096              |
| 6          | 102606964 | rs561936033;rs564433224                         | 952             | 38              | 12              | 6               | 62              | 1058              |
| 6          | 141880662 | rs528476876                                     | 946             | 119             | 14              | 6               | 37              | 1108              |
| 8          | 35797290  | rs6986608                                       | 785             | 63              | 185             | 5               | 162             | 1015              |
| 8          | 35803681  | rs6987006                                       | 785             | 63              | 191             | 5               | 162             | 1015              |
| 8          | 106901957 | rs7001221                                       | 962             | 92              | 18              | 0               | 54              | 1108              |
| 8          | 116765116 | rs55932928                                      | 802             | 128             | 36              | 7               | 70              | 1007              |
| 8          | 116786471 | rs73706214                                      | 795             | 158             | 84              | 8               | 62              | 1023              |
| 9          | 21933125  | rs2188126                                       | 829             | 40              | 54              | 7               | 126             | 1002              |
| 9          | 21936381  | rs7875199                                       | 835             | 40              | 54              | 7               | 126             | 1008              |
| 9          | 36745892  | rs11998844                                      | 796             | 115             | 204             | 8               | 284             | 1203              |
| 9          | 89541597  | rs149736480                                     | 1057            | 179             | 47              | 8               | 11              | 1255              |
| 9          | 100436598 | rs559260094;rs11300168                          | 893             | 229             | 305             | 7               | 52              | 1181              |
| 9          | 100440034 | rs530688400;rs530688400;rs530688400;rs533050515 | 822             | 132             | 155             | 8               | 61              | 1023              |
| 9          | 117107340 | rs553726877;rs143632430                         | 963             | 61              | 107             | 1               | 87              | 1112              |
| 11         | 22281515  | rs7124796                                       | 911             | 62              | 446             | 8               | 162             | 1143              |
| 12         | 46895231  | rs560933247;rs552960140                         | 995             | 316             | 162             | 4               | 61              | 1376              |
| 12         | 132844471 | rs374414835                                     | 897             | 32              | 118             | 3               | 143             | 1075              |
| 13         | 33428261  | rs550256702;rs200565222                         | 908             | 57              | 11              | 6               | 61              | 1032              |
| 15         | 29152317  | rs143431483                                     | 806             | 56              | 11              | 3               | 149             | 1014              |
| 15         | 45701904  | rs532073340;rs2453545                           | 1114            | 71              | 16              | 8               | 136             | 1329              |

|    |               |                                         |      |     |     |   |     |      |
|----|---------------|-----------------------------------------|------|-----|-----|---|-----|------|
| 15 | 48392165      | rs1834640                               | 954  | 218 | 931 | 6 | 308 | 1486 |
| 15 | 48394586      | rs57108441                              | 749  | 210 | 929 | 7 | 254 | 1220 |
| 15 | 48396808      | rs1559857                               | 698  | 132 | 493 | 4 | 212 | 1046 |
| 15 | 48400199      | rs2675345                               | 952  | 233 | 763 | 5 | 268 | 1458 |
| 15 | 48411821      | rs2675346                               | 698  | 132 | 496 | 1 | 210 | 1041 |
| 15 | 48414969      | rs2433354                               | 696  | 133 | 494 | 1 | 208 | 1038 |
| 15 | 48418645      | rs2675347                               | 696  | 134 | 494 | 6 | 211 | 1047 |
| 15 | 48420744      | rs2675348                               | 712  | 134 | 494 | 1 | 211 | 1058 |
| 15 | 48426484      | rs1426654                               | 953  | 285 | 996 | 3 | 308 | 1549 |
| 15 | 48433494      | rs2470102                               | 952  | 235 | 759 | 6 | 266 | 1459 |
| 15 | 48438269      | rs2469597                               | 694  | 132 | 492 | 2 | 211 | 1039 |
| 15 | 48444748      | rs2459394                               | 694  | 134 | 493 | 6 | 213 | 1047 |
| 15 | 48445387      | rs2675349                               | 694  | 134 | 494 | 1 | 212 | 1041 |
| 15 | 10140744<br>2 | rs11247239                              | 1417 | 247 | 93  | 8 | 69  | 1741 |
| 16 | 12747232      | rs538270522;rs373765644;rs1<br>50214949 | 959  | 39  | 19  | 1 | 30  | 1029 |
| 17 | 59070441      | rs7214111                               | 1341 | 70  | 186 | 4 | 14  | 1429 |
| 18 | 11353065      | rs9966812                               | 908  | 46  | 118 | 4 | 270 | 1228 |
| 18 | 32916594      | rs2974909                               | 982  | 37  | 17  | 4 | 26  | 1049 |
| 19 | 42392130      | rs28396197                              | 851  | 52  | 185 | 8 | 176 | 1087 |
| 20 | 19286867      | rs6035287                               | 809  | 199 | 281 | 8 | 62  | 1078 |
| 21 | 17877794      | rs2823850                               | 877  | 70  | 61  | 8 | 98  | 1053 |
| 21 | 17917666      | rs28647658                              | 861  | 76  | 67  | 8 | 101 | 1046 |
| 21 | 17928554      | rs2823880                               | 877  | 75  | 77  | 8 | 106 | 1066 |
|    |               |                                         |      |     |     |   |     |      |

#### NOTES:

- 1) It is better to normalize number of counts for each table in order to take into account admixtures.  
For example, for Europe, there is large admixture with AMR, SAS
- 2) I calculated only 3 tables for AFR, EAS, and EUR. The computation was done based on 1000Genomes, thus, OCE is missing.
- 3) Surprisingly, The Europe has the list number of fixed continent-specific alleles. East Asia has >10x more.

Below is the most prominent case for Europe:

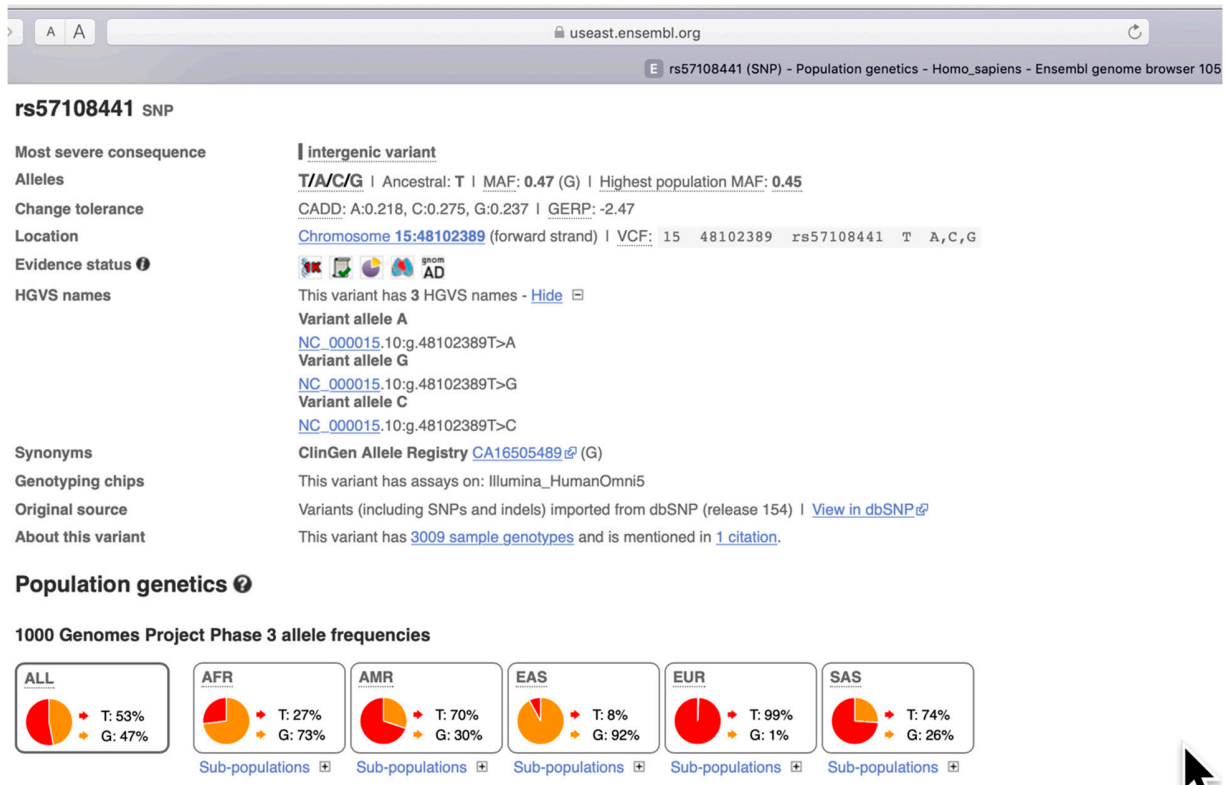

Computation of the reverse case (0) instead of (1) for fixation:

#### HISTORY:

```

2023 cp PopulationSpecific1000gEURreverse.pl PopulationSpecific1000gEURreverseCOMP.pl
2024 vi PopulationSpecific1000gEURreverseCOMP.pl
2025 history 60
2026 ls -l *pl
2027 vi EuropeSNPstart2reverse.pl
2028 perl EuropeSNPstart2reverse.pl

```

Figures for PaperAtlas3

rs34137121 SNP

Most severe consequence

Alleles

Change tolerance

Location

Evidence status

HGVS names

Synonyms

Original source

About this variant

Intron variant | See all predicted consequences

C/G | Ancestral: C | MAF: 0.18 (G) | Highest population MAF: 0.48

CADD: G:4.456 | GERP: 0.28

Chromosome 15:39371864 (forward strand) | VCF: 15 39371864 rs34137121 C G

AD

This variant has 4 HGVS names - Hide

NC\_000015.10:g.39371864C>G

ENST00000558209.1:n.99-11723G>C

ENST00000559318.1:n.408+48680G>C

ENST00000560484.1:n.67+49045G>C

ClinGen Allele Registry CA14077454 (G)

Variants (including SNPs and indels) imported from dbSNP (release 154) | View in dbSNP

This variant overlaps 3 transcripts and has 3009 sample genotypes.

Population genetics

1000 Genomes Project Phase 3 allele frequencies

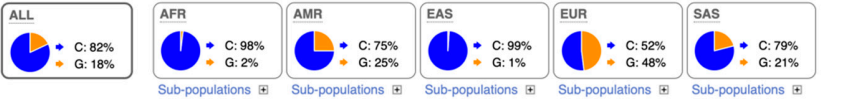

Jump to: 1000 Genomes Project Phase 3 (32) | gnomAD genomes r3.0 (10) | NCBI ALFA (12) | GEM-J (1) | TOPMed (1) | UK10K (2) | Gambia

1000 Genomes Project Phase 3 (32)

| Population | Allele: frequency (count)      | Genotype: frequency (count)        |
|------------|--------------------------------|------------------------------------|
| ALL        | C: 0.823 (4120) G: 0.177 (888) | C/C: 0.707 (1770) C/G: 0.232 (580) |
| AFR        | C: 0.983 (1300) G: 0.017 (22)  | C/C: 0.968 (640) C/G: 0.030 (20)   |
| ACB        | C: 0.958 (184) G: 0.042 (8)    | C/C: 0.917 (88) C/G: 0.083 (8)     |
| ASW        | C: 0.910 (111) G: 0.090 (11)   | C/C: 0.836 (51) C/G: 0.148 (9)     |
| ESN        | C: 1.000 (198)                 | C/C: 1.000 (99)                    |

rs3811801 SNP

Most severe consequence

Intron variant | [See all predicted consequences](#)

Alleles

G/A/C | Ancestral: G | MAF: 0.10 (A) | Highest population MAF: 0.49

Change tolerance

CADD: A:0.861, C:0.723 | GERP: -2.23

Location

Chromosome 4:99323162 (forward strand) | VCF: 4 99323162 rs3811801 G A,C

Evidence status



This variant has 4 HGVS names - [Hide](#)

HGVS names

Variant allele A

- NC\_000004.12:g.99323162G>A
- ENST00000639454.1:c.19-4276C>T

Variant allele C

- NC\_000004.12:g.99323162G>C
- ENST00000639454.1:c.19-4276C>G

Synonyms

ClinGen Allele Registry [CA101654415](#) (A)

Original source

Variants (including SNPs and indels) imported from dbSNP (release 154) | [View in dbSNP](#)

About this variant

This variant overlaps [7 transcripts](#), has [2504 sample genotypes](#) and is mentioned in [12 citations](#).

Population genetics

1000 Genomes Project Phase 3 allele frequencies

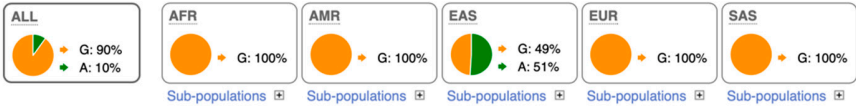

Jump to: [1000 Genomes Project Phase 3 \(32\)](#) | [gnomAD genomes r3.0 \(10\)](#) | [NCBI ALFA \(12\)](#) | [GEM-J \(1\)](#) | [TOPMed \(1\)](#) | [UK10K \(2\)](#)

1000 Genomes Project Phase 3 (32)

| Show All entries |                                | Show/hide columns           |            |
|------------------|--------------------------------|-----------------------------|------------|
| Population       | Allele: frequency (count)      | Genotype: frequency (count) |            |
| ALL              | G: 0.897 (4494) A: 0.103 (514) | GI: 0.849 (2126)            | AIA: 0.054 |
| AFR              | G: 1.000 (1322)                | GI: 1.000 (661)             |            |
| ACB              | G: 1.000 (192)                 | GI: 1.000 (96)              |            |
| ASW              | G: 1.000 (122)                 | GI: 1.000 (61)              |            |
| ESN              | G: 1.000 (198)                 | GI: 1.000 (99)              |            |

## rs7654389 SNP

Most severe consequence

Alleles

Change tolerance

Location

Evidence status ⓘ

HGVS names

Intron variant | [See all predicted consequences](#)

**C/A/G/T** | Ancestral: T | MAF: 0.15 (T) | Highest population MAF: 0.50

CADD: A:0.982, G:1.066, T:1.304 | GERP: -0.43

Chromosome 4:84193752 (forward strand) | VCF: 4 84193752 rs7654389 C A,G,T

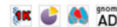

This variant has 15 HGVS names - [Hide](#) ⓘ

Variant allele T

- NC\_000004.12:g.84193752C>T
- ENST00000508406.1:n.580-44496G>A
- ENST00000513489.5:n.228+49359G>A
- ENST00000657959.1:n.156-44496G>A
- ENST00000668493.1:n.643-45622G>A

Variant allele A

- NC\_000004.12:g.84193752C>A
- ENST00000508406.1:n.580-44496G>T
- ENST00000513489.5:n.228+49359G>T
- ENST00000657959.1:n.156-44496G>T
- ENST00000668493.1:n.643-45622G>T

Variant allele G

- NC\_000004.12:g.84193752C>G
- ENST00000508406.1:n.580-44496G>C
- ENST00000513489.5:n.228+49359G>C
- ENST00000657959.1:n.156-44496G>C
- ENST00000668493.1:n.643-45622G>C

Synonyms

This variant has 4 synonyms - [Show](#) ⓘ

Original source

Variants (including SNPs and indels) imported from dbSNP (release 154) | [View in dbSNP](#) ⓘ

About this variant

This variant overlaps 4 [transcripts](#) and has 3009 [sample genotypes](#).

## Population genetics ⓘ

### 1000 Genomes Project Phase 3 allele frequencies

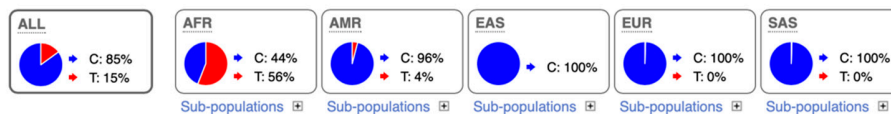

[Jump to: 1000 Genomes Project Phase 3 \(32\)](#) | [gnomAD genomes r3.0 \(10\)](#) | [NCBI ALFA \(12\)](#) | [TOPMed \(1\)](#) | [UK10K \(2\)](#) | [Gambian Genome Va](#)

### 1000 Genomes Project Phase 3 (32) ⓘ

| Population | Allele: frequency (count)      | Genotype: frequency (count)                         |
|------------|--------------------------------|-----------------------------------------------------|
| ALL        | C: 0.845 (4234) T: 0.155 (774) | C/C: 0.776 (1942) C/T: 0.124 (258) T/T: 0.100 (200) |
| AFR        | C: 0.436 (576) T: 0.564 (746)  | C/C: 0.189 (125) C/T: 0.281 (207) T/T: 0.530 (394)  |
| ACB        | C: 0.500 (96) T: 0.500 (96)    | C/C: 0.281 (27) C/T: 0.418 (40) T/T: 0.301 (29)     |
| ASW        | C: 0.467 (57) T: 0.533 (65)    | C/C: 0.197 (12) C/T: 0.281 (20) T/T: 0.522 (33)     |
| ESN        | C: 0.404 (80) T: 0.596 (118)   | C/C: 0.182 (18) C/T: 0.281 (28) T/T: 0.537 (54)     |
| GWD        | C: 0.451 (102) T: 0.549 (124)  | C/C: 0.195 (22) C/T: 0.281 (28) T/T: 0.524 (54)     |
| LWK        | C: 0.384 (76) T: 0.616 (122)   | C/C: 0.141 (14) C/T: 0.281 (28) T/T: 0.578 (58)     |
| MSL        | C: 0.418 (71) T: 0.582 (99)    | C/C: 0.153 (13) C/T: 0.281 (28) T/T: 0.566 (58)     |
| YRI        | C: 0.435 (94) T: 0.565 (122)   | C/C: 0.176 (19) C/T: 0.281 (28) T/T: 0.543 (55)     |

```
afedorov@bio:~/NOV2021$ more PopulationSpecificSNPsEUR1000reverseCOMP_ALL
5 165608363 rs830694 796 162 191 1 54 1013
7 102726056 rs4727559 617 70 12 7 363 1057
11 113869356 rs7930014 806 165 166 9 128 1108
13 25906675 rs114576175;rs3839990 745 129 204 6 154 1034
14 69314540 rs386768 504 77 20 7 512 1100
14 77353103 rs7157792 811 149 253 8 75 1043
15 48419386 rs2555364 675 132 492 1 211 1019
15 48448864 rs8037198 695 131 492 1 211 1038
15 48460188 rs8028919 794 136 493 1 212 1143
15 48461146 rs3817315 695 131 493 1 212 1039
15 48471615 rs11070628 739 63 438 0 229 1031
15 48485926 rs2413887 951 284 990 3 296 1534
```

```

15 48506574 rs8023477 741 62 429 0 201 1004
15 48514309 rs9920281 780 140 490 6 219 1145
17 60529690 rs4728116 899 160 427 7 57 1123
17 60531329 rs7218749 899 160 426 7 56 1122

```

```

afedorov@bio:~/NOV2021$ history 30
2027 vi EuropeSNPstart2reverse.pl
2028 perl EuropeSNPstart2reverse.pl
2029 history
2030 ls
2031 ls -l *ALL
2032 more FinalAfrica_ALL
2033 sort -k2 -rn FinalAfrica_ALL |more
2034 ls -l *ALL
2035 more FinalEastAsia_ALL
2036 less -S FinalEastAsia_ALL
2037 sort -k2 -rn FinalEastAsia_ALL |less -S
2038 ls -l *ALL
2039 less -S FinalEurope_ALL
2040 sort -k2 -nr FinalEurope_ALL |less -S
2041 top
2042 ls -l Pop*
2043 top
2044 ls -l Pop*
2045 top
2046 ls -l Pop*
2047 more PopulationSpecificSNPsEUR1000reverseCOMP_17
2048 top
2049 ls -l Pop*
2050 more PopulationSpecificSNPsEUR1000reverseCOMP_15
2051 more PopulationSpecificSNPsEUR1000reverse_15
2052 ls -l Pop*
2053 perl ConcatenateFiles.pl PopulationSpecificSNPsEUR1000reverseCOMP_
2054 ls -l Pop*
2055 more PopulationSpecificSNPsEUR1000reverseCOMP_ALL
2056 history 30

```

I checked a reciprocal case (0|1), when changed 1 to 0 in PopulationSpecific1000gEURreverseCOMP.pl and computed PopulationSpecificSNPsEUR1000reverseCOMP\_17 files for Europe. Got 16 cases only (see page above).

## April 11, 2022

I got a lot of triple alleles in 'REVERSE' computations:

```

13 25906675 rs114576175;rs3839990 745 129 204 6 154 1034

```

I need to remove them from the Table 2.

## April 15, 2022

GOAL: Calculation of ancestral alleles from the field "AA=g" in the column #8 of Human VCF 1000G.

APPROACH: Creation of a short version of VCF 1000G with only columns #1, 2, 3, 4, 5, and 8. They are in the files: 8COLUMNSchr\_1..22. Done by a command line highlighted in yellow below.

```

zcat ALL.chr22.phase3_shapeit2_mvncall_integrated_v5a.20130502.genotypes.vcf.gz |cut -
f1,2,3,4,5,8
2021 zcat ALL.chr22.phase3_shapeit2_mvncall_integrated_v5a.20130502.genotypes.vcf.gz |cut -
f1,2,3,4,5,8 >8COLUMNSchr_22
2022 ls -l ~/NOV2021/*.pl
2023 ls -l ~/NOV2021/ConcatenateFiles.pl

```

```

2024 more ~/NOV2021/ConcatenateFiles.pl
2025 cp ~/NOV2021/ConcatenateFiles.pl .
2026 ls
2027 cp ConcatenateFiles.pl 8columns.pl
2028 vi 8columns.pl
2029 history 40
2030 vi 8columns.pl
2031 perl 8columns.pl
2032 vi 8columns.pl
2033 perl 8columns.pl
2034 ls -l
2035 rm 8columns.pl
2036 more 8COLUMNSchr_1
2037 ls
2038 ls *.pl
2039 history
2040 vi ancestral.pl
2041 ls
2042 vi ancestral.pl
2043 perl ancestral.pl
2044 more 8COLUMNSchr_11
2045 vi ancestral.pl
2046 perl ancestral.pl
2047 vi ancestral.pl
2048 perl ancestral.pl
2049 vi ancestral.pl
2050 perl ancestral.pl
2051 vi ancestral.pl
2052 perl ancestral.pl
2053 vi ancestral.pl
2054 perl ancestral.pl
2055 vi ancestral.pl
2056 perl ancestral.pl
2057 vi ancestral.pl
2058 perl ancestral.pl
2059 vi ancestral.pl
2060 perl ancestral.pl
2061 vi ancestral.pl
2062 perl ancestral.pl
2063 vi ancestral.pl
2064 perl ancestral.pl
2065 history 50
afedorov@bio:~/2500GENOMES$ pwd
/home/afedorov/2500GENOMES

PROGRAM ancestral.pl:
#!/usr/local/perl
#chomp($ARGV[0]);
# $x = $ARGV[0];

for $x (1..22) {
$c=0;

print "Chromosome $x \n";
$name = '8COLUMNSchr_' . $x;
$out = 'AncestralChr_' . $x;
open(OUT, ">$out");
open(IN, "$name") or die "cannot open chr $x \n";
while(<IN>) {
    chomp;
    $c++;
    if($c<254) {next;}
    $aa=''; #ancestral allele
    $X='nnn'; #unsestral status
    $L1=$L2=0; #SNP length
    @line=split(/\t/, $_);
    $line[3]=~s/\s//g;
    $line[4]=~s/\s//g;
    if ($line[5] =~/AA=([agtcAGTC]+)/) {$aa=uc($1); }
    if ($line[3] eq $aa) {$X='AA=ref';}
    elsif ($line[4] eq $aa) {$X='AA=alt';}

```

```

else { $X='AA=nnn'; }
$L1=length($line[3]); $L2=length($line[4]);
if ($L1 !=1 || $L2!=1) { $X='INDEL'; }
if ($line[3] =~/,/ || $line[4] =~/,/) { $X='TRIPLT'; } #tri-allele SNP
print OUT "$X\t$line[3]\t$line[4]\t$line[1]\t$line[2]\t$aa\n";
}
close(OUT); close(IN);
}

```

From email to ATLAS3 team:

Hi Gennady,

You are absolutely right, in the files I sent you there is a fraction that presents triple-allele SNPs. These cases are misleading, therefore, I removed them. Now the cleaned files with only di-allele SNPs are in BIO server /home/afedorov/NOV2021

The names of these three tables are the following:

*PopulationSpecificSNPsAFR1000reverse\_ALL\_2allele*

*PopulationSpecificSNPsCHI1000reverse\_ALL\_2allele*

*PopulationSpecificSNPsEUR1000reverse\_ALL\_2allele*

*These are final files for rsfSNP alleles from AFR, EUR, and EAS*

The data for rscSNP alleles are in the files FinalRegion\_ALL (all chromosomes)

```

afedorov@bio:~/NOV2021$ ls -l Final*ALL
-rw-rw-r-- 1 afedorov afedorov 6683791 anp 2 23:43 FinalAfrica_ALL
-rw-rw-r-- 1 afedorov afedorov 471472 anp 2 23:44 FinalAmerica_ALL
-rw-rw-r-- 1 afedorov afedorov 145722 anp 2 23:44 FinalEastAsia_ALL
-rw-rw-r-- 1 afedorov afedorov 1086531 anp 2 23:44 FinalEurope_ALL
-rw-rw-r-- 1 afedorov afedorov 196742 anp 2 23:41 FinalOceania_ALL

```

## April 16, 2022

Created program AddAncestral.pl for adding Ancestral SNP status for rscSNPs.

Obtained new tables:

```

afedorov@bio:~/NOV2021$ ls -l *ALL_AA
-rw-rw-r-- 1 afedorov afedorov 4535233 anp 17 03:43 FinalAfrica_ALL_AA
-rw-rw-r-- 1 afedorov afedorov 190966 anp 17 03:43 FinalAmerica_ALL_AA
-rw-rw-r-- 1 afedorov afedorov 20904 anp 17 03:43 FinalEastAsia_ALL_AA
-rw-rw-r-- 1 afedorov afedorov 114153 anp 17 03:43 FinalEurope_ALL_AA
-rw-rw-r-- 1 afedorov afedorov 78017 anp 17 03:43 FinalOceania_ALL_AA

```

Obtained new tables

Now working on fixed/lost SNPs program: AddAncestral\_rsfSNP.pl

Done!

```

afedorov@bio:~/NOV2021$ ls -l Pop*allele*
-rw-rw-r-- 1 afedorov afedorov 314824 anp 12 03:33
PopulationSpecificSNPsAFR1000reverse_ALL_2allele

```

```

-rw-rw-r-- 1 afedorov afedorov 392628 anp 17 04:34
PopulationSpecificSNPsAFR1000reverse_ALL_2allele_AA
-rw-rw-r-- 1 afedorov afedorov 498606 anp 12 03:32
PopulationSpecificSNPsCHI1000reverse_ALL_2allele
-rw-rw-r-- 1 afedorov afedorov 625653 anp 17 04:34
PopulationSpecificSNPsCHI1000reverse_ALL_2allele_AA
-rw-rw-r-- 1 afedorov afedorov 1937 anp 12 03:33
PopulationSpecificSNPsEUR1000reverse_ALL_2allele
-rw-rw-r-- 1 afedorov afedorov 2571 anp 17 04:34
PopulationSpecificSNPsEUR1000reverse_ALL_2allele_AA

```

Below is region-specific fixed/loss SNPs from Europe.  
A majority are triplets! Must be removed.

```

afedorov@bio:~/NOV2021$ more PopulationSpecificSNPsEUR1000reverse_ALL_2allele_AA
1 31620274 rs533645834 TRIPLT G GA,GAA,GAAA 969 50 126 5 59 1083
1 45778640 rs112417297 TRIPLT C CTTTTTTTC,CTTTTTTTT 950 54 183 9
18 1031
2 39875246 rs72934232 TRIPLT C G,T 967 60 72 2 66 1095
2 40533600 rs61681991 TRIPLT G GA,GC,GGC 937 72 74 8 18 1035
3 156039668 rs6773597 TRIPLT G A,T 870 44 54 6 186 1106
3 188113131 rs869631 TRIPLT C A,T 882 54 14 4 286 1226
4 9413414 rs10009417 TRIPLT G A,T 904 57 140 2 162 1125
4 190831703 rs2338002 TRIPLT C G,T 1030 74 230 2 18 1124
5 174485090 rs1875965 TRIPLT T C,G 992 80 82 8 16 1096
6 141880662 rs528476876 TRIPLT C CCTAT,CCTATCTAT,CCTATCTATCTAT,CCTATCTATCTATCTAT
946 119 14 6 37 1108
8 35797290 rs6986608 AA=alt T G 785 63 185 5 162 1015
8 35803681 rs6987006 AA=alt A G 785 63 191 5 162 1015
8 106901957 rs7001221 TRIPLT T C,G 962 92 18 0 54 1108
8 116765116 rs55932928 AA=alt A G 802 128 36 7 70 1007
8 116786471 rs73706214 AA=nnn T C 795 158 84 8 62 1023
9 21933125 rs2188126 AA=alt G C 829 40 54 7 126 1002
9 21936381 rs7875199 AA=alt T C 835 40 54 7 126 1008
9 36745892 rs11998844 AA=ref A G 796 115 204 8 284 1203
9 89541597 rs149736480 TRIPLT A ATTAT,ATTATTTAT,ATTATTTATTTATTTAT 1057 179
47 8 11 1255
11 22281515 rs7124796 TRIPLT T A,G 911 62 446 8 162 1143
12 132844471 rs374414835 TRIPLT T TCA,TCACA 897 32 118 3 143 1075
15 29152317 rs143431483 AA=nnn A G 806 56 11 3 149 1014
15 48392165 rs1834640 AA=alt A G 954 218 931 6 308 1486
15 48394586 rs57108441 AA=ref T G 749 210 929 7 254 1220
15 48396808 rs1559857 AA=alt G A 698 132 493 4 212 1046
15 48400199 rs2675345 AA=alt A G 952 233 763 5 268 1458
15 48411821 rs2675346 AA=alt C T 698 132 496 1 210 1041
15 48414969 rs2433354 AA=alt C T 696 133 494 1 208 1038
15 48418645 rs2675347 AA=alt A G 696 134 494 6 211 1047
15 48420744 rs2675348 AA=alt A G 712 134 494 1 211 1058
15 48426484 rs1426654 AA=alt A G 953 285 996 3 308 1549
15 48433494 rs2470102 AA=alt A G 952 235 759 6 266 1459
15 48438269 rs2469597 AA=alt C T 694 132 492 2 211 1039
15 48444748 rs2459394 AA=alt T A 694 134 493 6 213 1047
15 48445387 rs2675349 AA=alt A G 694 134 494 1 212 1041
15 101407442 rs11247239 TRIPLT G A,C,T 1417 247 93 8 69 1741
17 59070441 rs7214111 TRIPLT A G,T 1341 70 186 4 14 1429
18 11353065 rs9966812 TRIPLT T A,G 908 46 118 4 270 1228
18 32916594 rs2974909 TRIPLT A G,T 982 37 17 4 26 1049
19 42392130 rs28396197 AA=alt T C 851 52 185 8 176 1087
20 19286867 rs6035287 TRIPLT A C,T 809 199 281 8 62 1078
21 17877794 rs2823850 AA=alt C T 877 70 61 8 98 1053
21 17917666 rs28647658 AA=alt C T 861 76 67 8 101 1046
21 17928554 rs2823880 AA=alt A C 877 75 77 8 106 1066
afedorov@bio:~/NOV2021$

```

## CONCLUSIONS!

OK. I finished insertion of Ancestral status. Found TRIPLETS (TRIPLT) that is better to remove.

Copied programs and new tables into:  
Alexeis-iMac:ATLAS3sept2020 afedorov\$ pwd  
/Users/afedorov/Documents/ATLAS3sept2020

Need to prepare Excel tables and send to Co-authors tomorrow

**April 17, 2022**

**Copied the data for Table1 and Table2 from BIO into MACcri:**

1) Removed all Triplets (TRIPLT) from Table2, rsfSNPs and saved into new filenames:

```
grep -v TRI PopulationSpecificSNPsAFR1000reverse_ALL_2allele_AA >Table2rsfSNPafrica
grep -v TRI PopulationSpecificSNPsCHI1000reverse_ALL_2allele_AA >Table2rsfSNPeastasia
grep -v TRI PopulationSpecificSNPsEUR1000reverse_ALL_2allele_AA >Table2rsfSNPeurope
```

2) Counted number of derived (alt) rsfSNPs and ancestral (ref) rsfSNPs:

```
Alexeis-iMac:ATLAS3sept2020 afedorov$ ls -l Tab*
-rw-r--r--@ 1 afedorov staff 34424 Apr 13 21:02 Table1_Atlas3march2022.xlsx
-rw-r--r-- 1 afedorov staff 387634 Apr 17 14:36 Table2rsfSNPafrica
-rw-r--r-- 1 afedorov staff 589341 Apr 17 14:38 Table2rsfSNPeastasia
-rw-r--r-- 1 afedorov staff 1383 Apr 17 14:38 Table2rsfSNPeurope
Alexeis-iMac:ATLAS3sept2020 afedorov$ grep alt Table2rsfSNPeastasia |wc
3473 41676 193185
Alexeis-iMac:ATLAS3sept2020 afedorov$ grep ref Table2rsfSNPeastasia |wc
5719 68628 319177
Alexeis-iMac:ATLAS3sept2020 afedorov$ grep ref Table2rsfSNPeurope |wc
2 24 113
Alexeis-iMac:ATLAS3sept2020 afedorov$ grep alt Table2rsfSNPeurope |wc
21 252 1159
Alexeis-iMac:ATLAS3sept2020 afedorov$ grep ref Table2rsfSNPafrica |wc
5939 71268 332693
Alexeis-iMac:ATLAS3sept2020 afedorov$ grep alt Table2rsfSNPafrica |wc
168 2016 9385
```

The highest number of ancestral "lost" rsfSNPs alleles was in Europe (ancestral=91.3% vs derived=8.7%), then EAS (ancestral=37.8 % vs derived=62.2%), then Africa (ancestral=2.8% vs derived=97.2%)

Processed data for rscSNPs. They do NOT have Triplets (TRI)

```
Alexeis-iMac:ATLAS3sept2020 afedorov$ grep ref FinalAfrica_ALL_AA |wc
59130 886950 3445906
Alexeis-iMac:ATLAS3sept2020 afedorov$ grep alt FinalAfrica_ALL_AA |wc
16429 246435 957223
Alexeis-iMac:ATLAS3sept2020 afedorov$ grep ref FinalAmerica_ALL_AA |wc
3257 48855 185764
Alexeis-iMac:ATLAS3sept2020 afedorov$ grep alt FinalAmerica_ALL_AA |wc
27 405 1537
Alexeis-iMac:ATLAS3sept2020 afedorov$ grep ref FinalEastAsia_ALL_AA |wc
318 4770 18337
Alexeis-iMac:ATLAS3sept2020 afedorov$ grep alt FinalEastAsia_ALL_AA |wc
22 330 1293
Alexeis-iMac:ATLAS3sept2020 afedorov$ grep ref FinalEurope_ALL_AA |wc
1823 27345 108920
Alexeis-iMac:ATLAS3sept2020 afedorov$ grep alt FinalEurope_ALL_AA |wc
51 765 3019
Alexeis-iMac:ATLAS3sept2020 afedorov$ grep ref FinalOceania_ALL_AA |wc
269 4035 15226
Alexeis-iMac:ATLAS3sept2020 afedorov$ grep alt FinalOceania_ALL_AA |wc
11 165 620
```

The highest number of ancestral rscSNP alleles was in Africa (ancestral=21.7% vs derived=78.3%), then much less in other continents: EAS (ancestral=6.5% vs derived=93.5%), America (ancestral=0.8% vs derived=99.2%), Europe (ancestral=2.7% vs derived=97.3%), Oceania (ancestral=3.9% vs derived=96.1%)

Created **Table1\_data\_Apr17** that contains data on rscSNP alleles in AFR, AMR, EAS, EUR, OCE

Created **Table2\_data\_Apr17** that contains data on rsfSNP alleles in 3 regions AFR, EAS, EUR

These two tables should be Supplementary tables for the ATLAS-3 paper.

## April 19, 2022

Clustering Table 2.

HISTORY:

```
mv FinalAfrica_ALL_AA FinalAfrica_ALL_AA.tx
600 mv FinalAfrica_ALL_AA.tx FinalAfrica_ALL_AA.txt
601 mv FinalAmerica_ALL_AA FinalAmerica_ALL_AA.txt
602 mv FinalEastAsia_ALL_AA FinalEastAsia_ALL_AA.txt
603 mv FinalEurope_ALL_AA FinalEurope_ALL_AA.txt
604 mv FinalOceania_ALL_AA FinalOceania_ALL_AA.txt
605 ls
606 ls -l *allele_AA
607 mv PopulationSpecificSNPsAFR1000reverse_ALL_2allele_AA
PopulationSpecificSNPsAFR1000reverse_ALL_2allele_AA.txt
608 mv PopulationSpecificSNPsCHI1000reverse_ALL_2allele_AA
PopulationSpecificSNPsCHI1000reverse_ALL_2allele_AA.txt
609 mv PopulationSpecificSNPsEUR1000reverse_ALL_2allele_AA
PopulationSpecificSNPsEUR1000reverse_ALL_2allele_AA.txt
610 ls
611 ls -l Table2rs*
612 mv Table2rsf1SNPafrica Table2rsf1SNPafrica.txt
613 mv Table2rsf1SNPeastasia Table2rsf1SNPeastasia.txt
614 mv Table2rsf1SNPeurope Table2rsf1SNPeurope.txt
615 wc Table2rsf1SNPeurope.txt
616 wc Table2rsf1SNPeastasia.txt
617 wc Table2rsf1SNPafrica.txt
618 ls
619 vi ClustersSNP.pl
620 more Table2rsf1SNPafrica.txt
621 ls
622 vi ClustersSNP.pl
623 perl ClustersSNP.pl Table2rsf1SNPafrica.txt
624 vi ClustersSNP.pl
625 vi ClustersSNP.pl
626 perl ClustersSNP.pl Table2rsf1SNPafrica.txt
627 vi ClustersSNP.pl
628 perl ClustersSNP.pl Table2rsf1SNPeastasia.txt
629 perl ClustersSNP.pl Table2rsf1SNPeurope.txt
630 history
```

OK. I calculated numbers of rsfSNP clusters and put the new data into Table 2

## April 22, 2022

Computed Top 10% of Africa-specific rscSNPs from 77,820 SNPs in Table 1 (column 3). New filename: FinalAfrica\_rscSNPs10percent. These SNPs are sorted by their frequency in Africa

IN MAC CRI command line:

```
Alexeis-iMac:ATLAS3sept2020 afedorov$ sort -k11 -nr FinalAfrica_ALL_AA.txt | head -7782  
>FinalAfrica_rscSNPs10percent
```

I need to send this file to Gennady
