# Supplementary material for: Analysis of Common SNPs across Continents Reveals Major Genomic Differences between Human Populations
Source: MDPI journal article supplement (doi:10.3390/genes13081472), 2022-08-18
Supplement: s1 [file s1]

## Instruction manual for ATLAS3 project

### Example for getting ARSA SNPs for Africa

#### 1) Command lines for *AfricaSimonStep1.pl*.

Type in a Linux command line: `perl AfricaSimonStep1.pl 19`

Here, the argument (\$ARGV[0]) is the number of chromosome. In this example it is chromosome-19. This program requires two support files: `simon_pops2_A2.txt` and `ids_simon`. In addition, in line=40 a user must specify the path to the Simons' database: `$name = '/home/afedorov/simon/simon_chr' . $L . '.gz'`. Here "\$L" is a chromosome number. In our example \$L=19. The output filename is `AFR_SNPs_19`.

In order to run this perl program simultaneously for all chromosomes use another program with a command line:

Type in a Linux command line: `perl AfricanSNPstart1.pl`

#### 2) Command lines for *Africa1000gStep2\_v3.pl*

Type in a Linux command line: `perl Africa1000gStep2_v3.pl 19`

Here, the argument (\$ARGV[0]) is the number of chromosome. In this example it is chromosome-19. This program requires two support files: `2504ids` and `igsr_samples.tsv`, and also the output from the previous program - `AFR_SNPs_19`. In addition, in line=44 a user must specify the path to the 1000 Genomes database:

`$name = '/home/afedorov/2500GENOMES/ALL.chr' . $L . '.phase3_shapeit2_mvncall_integrated_v5a.20130502.genotypes.vcf.gz';`. Here "\$L" is a chromosome number. In our example \$L=19. The output filename is `AfricaSpecificV3_19`.

In order to run this perl program simultaneously for all chromosomes use another program with a command line:

Type in a Linux command line: `perl AfricanSNPstart2.pl`

#### 3) Command lines for *AfricanSNPsESTONIA.pl*.

Type in a Linux command line: `perl AfricanSNPsESTONIA.pl 19`

Here, the argument (\$ARGV[0]) is the number of chromosome. In this example it is chromosome-19. This program requires one support file: `estonian_pops2_A2.txt`, and also the output from the previous program - `AfricaSpecificV3_19`. In addition, in line=20 a user must specify the path to the Estonian database:

`$name = '/home/afedorov/EGDP_PaganiEtAl2016_Release_Build37_VCF/EGDP_PaganiEtAl2016_Release_Build37_Ch' . $L . '.vcf.gz'`. Here "\$L" is a chromosome number. In our example \$L=19. The outputs are three files with filenames: `AfricanSpecificSNPsEstonia_19`, `AfricanSpecificSNPsEstonia2_19`, and `AfricanSpecificSNPsEstonia3_19`

In order to run this perl program simultaneously for all chromosomes use another program with a command line:

Type in a Linux command line: `perl AfricanSNPstart3.pl`

### **For getting ARSA SNPs for America, East Asia, Europe, and Oceania follow the protocol for Africa using the programs, that are specific for your region:**

American ARSA – 1) *AmericanSNPs2020.pl*; 2) *America1000gStep2\_v2.pl*; 3) *AmericanSNPsESTONIA.pl*.

For East Asia ARSA – 1) *ChinaSimonStep1.pl*; 2) *China1000gStep2\_v2.pl*; 3) *ChinaEstoniaStep3.pl*. For

European ARSA – 1) *EuropeSimonStep1.pl*; 2) *Europe1000gStep2\_v2.pl*; 3) *EuropeEstoniaStep3.pl*. For

obtaining Oceania ARSA we used the following programs: 1) *OceaniaSimonStep1.pl*; 2)

*Oceania1000gStep2.pl*; 3) *OceanEstoniaStep3.pl*.

### Example for getting RACA SNPs for Africa

#### 1) Command lines for *PopulationSpecific1000gAFReverse.pl*

Type in a Linux command line: `perl PopulationSpecific1000gAFReverse.pl 19`

Here, the argument (\$ARGV[0]) is the number of chromosome. In this example it is chromosome-19. This program requires two support files: `2504ids` and `igsr_samples.tsv`. In addition, in line=28 a user must specify the path to the 1000 Genomes database:

`$name = '/home/afedorov/2500GENOMES/ALL.chr' . $L . '.phase3_shapeit2_mvncall_integrated_v5a.20130502.genotypes.vcf.gz';`. Here "\$L"

is a chromosome number. In our example \$L=19. The output filename is  
5PopulationSpecificSNPsAFR1000reverse\_19.

In order to run this perl program simultaneously for all chromosomes use another program with a command line:

Type in a Linux command line: `perl AfricaSNPstart2reverse.pl`

**For getting RACA SNPs for East Asia and Europe follow the protocol for Africa using the programs, that are specific for your region:**

for East Asia RACA SNPs - *PopulationSpecific1000gCHIreverse.pl*; for European RACA - *PopulationSpecific1000gEURreverse.pl*.

**The details of command lines are shown in the electronic notebook for this project**

ATLAS3\_notebook\_protocols.docx
